# Supplementary material for: Charge carrier dynamics investigation of Cu2S–In2S3 heterostructures for the conversion of dinitrogen to ammonia via photo-electrocatalytic reduction
Source: Royal Society of Chemistry journal article supplement (doi:10.1039/d1ta00581b), 2021-01-01
Supplement: d1ta00581b1.pdf [file d1ta00581b1.pdf]

## **Supplemental Information**

### **Charge Carrier Dynamics Investigation of Dinitrogen to Ammonia by Photo-electrocatalytic Reduction via Cu<sub>2</sub>S-In<sub>2</sub>S<sub>3</sub> Heterostructure**

**This supplemental file includes:**

- Supplemental Figure S1 to S46
- Supplemental Table S1 to S3

The sequence is the same as they are mentioned in the main text.

## Supplemental Figures

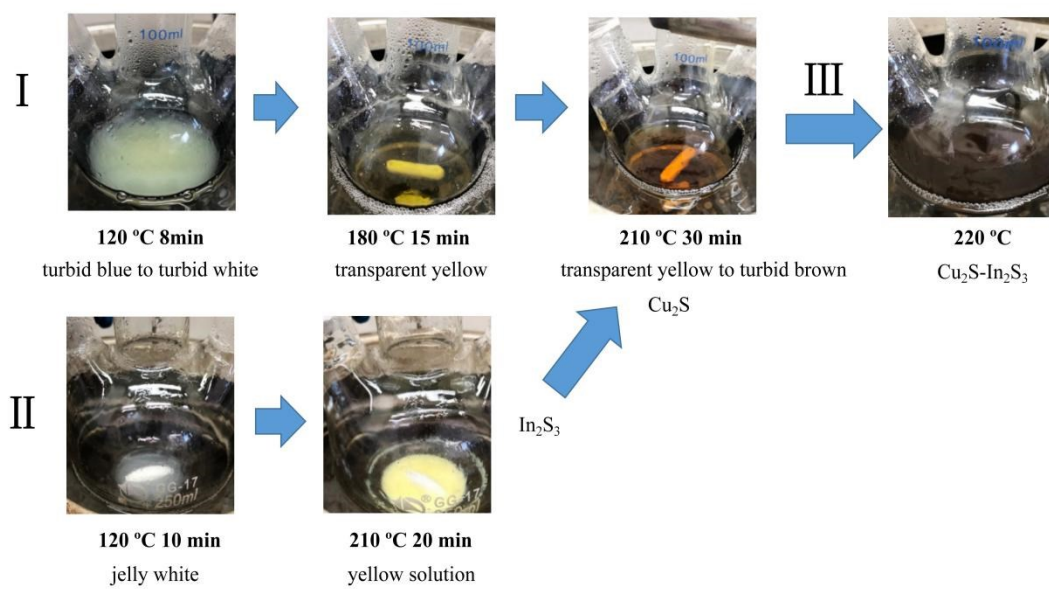

Figure S1. Schematic electronic photos for the synthesis of heterojunction catalysts.

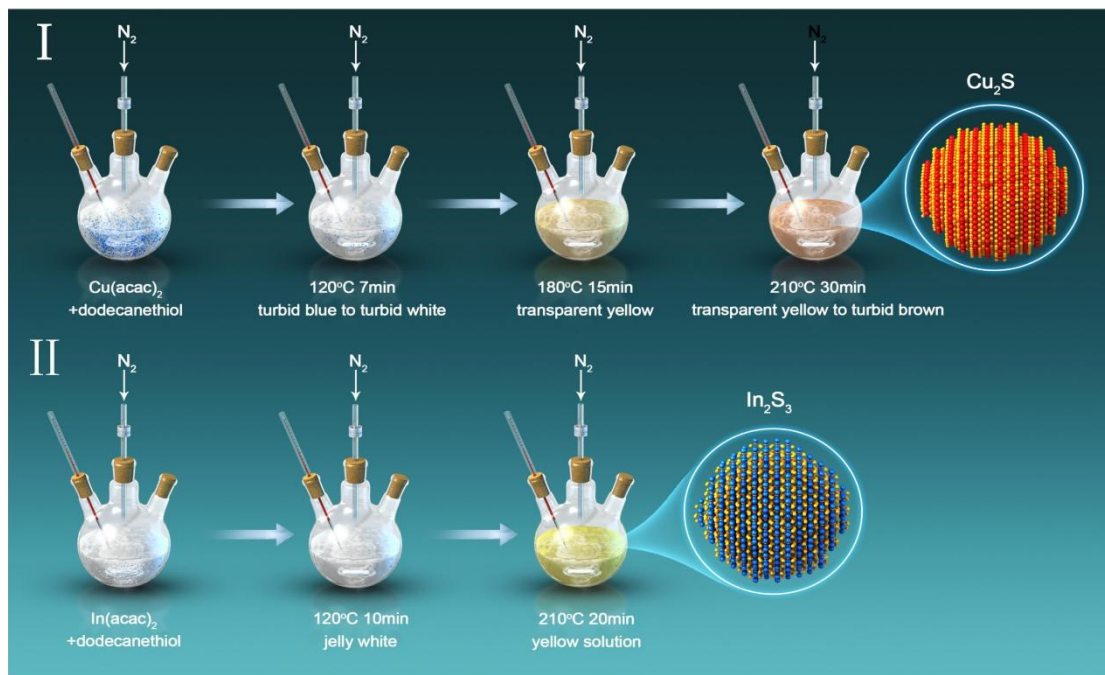

**Figure S2.** The schematic procedure of synthesizing  $\text{Cu}_2\text{S}$  and  $\text{In}_2\text{S}_3$ , respectively.

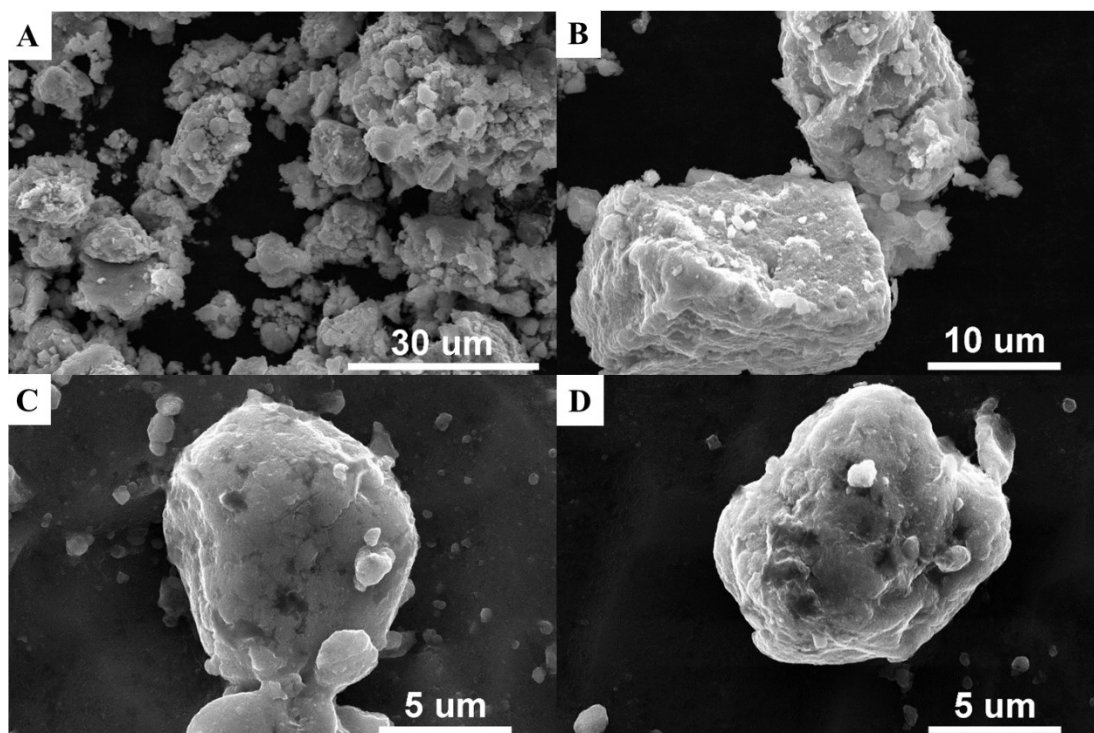

Figure S3. SEM images of  $\text{Cu}_2\text{S-In}_2\text{S}_3$  heterostructure in different magnetic resolution.



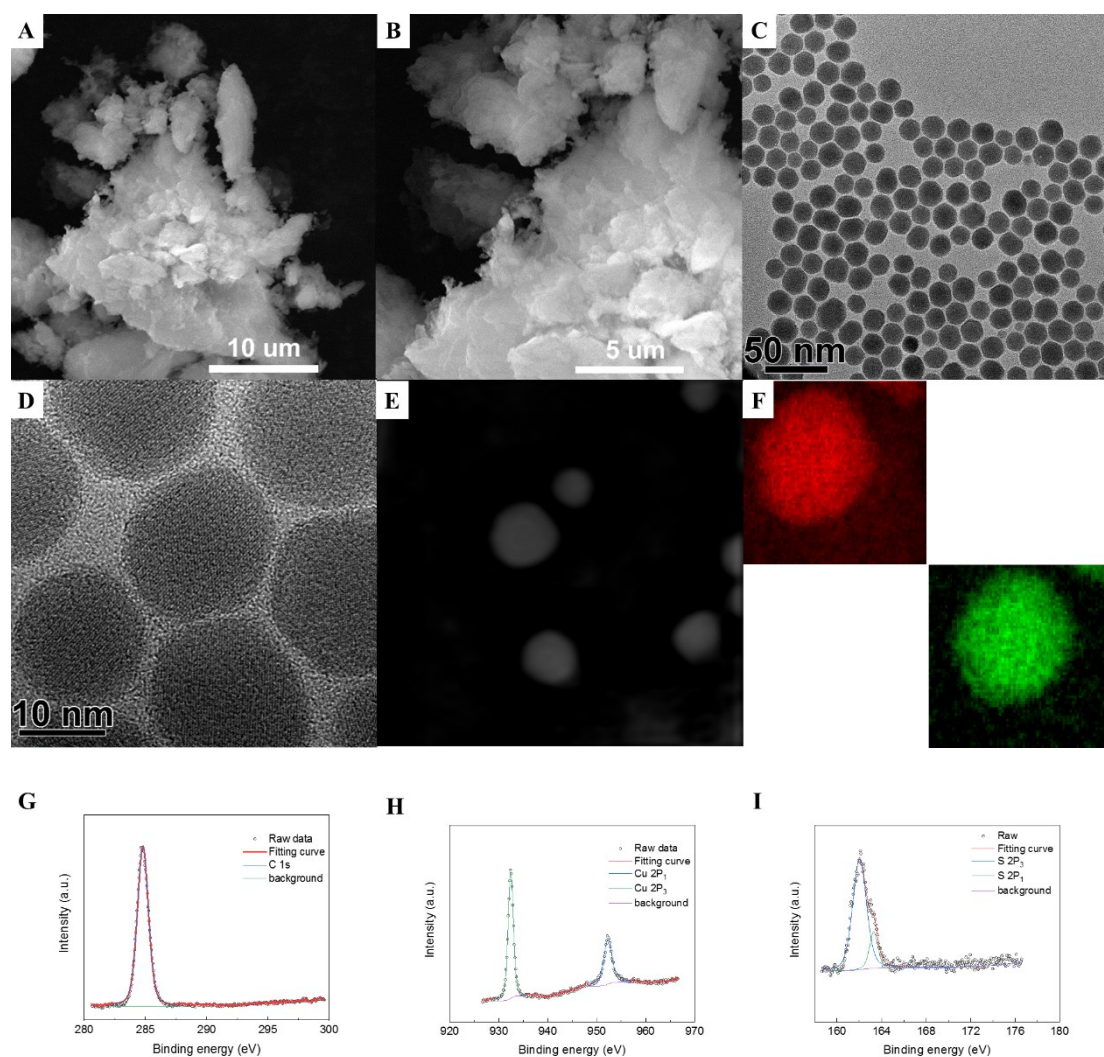

**Figure S4.** A), B) SEM images of  $\text{Cu}_2\text{S}$  sample in different magnetic resolution. C), D) TEM images of  $\text{Cu}_2\text{S}$  sample and E) The HAADF-STEM image. F) The corresponding mapping images of  $\text{Cu}_2\text{S}$  sample. G), H), I) XPS spectra of  $\text{Cu}_2\text{S}$  sample for Cu 2p and S 2p, respectively.

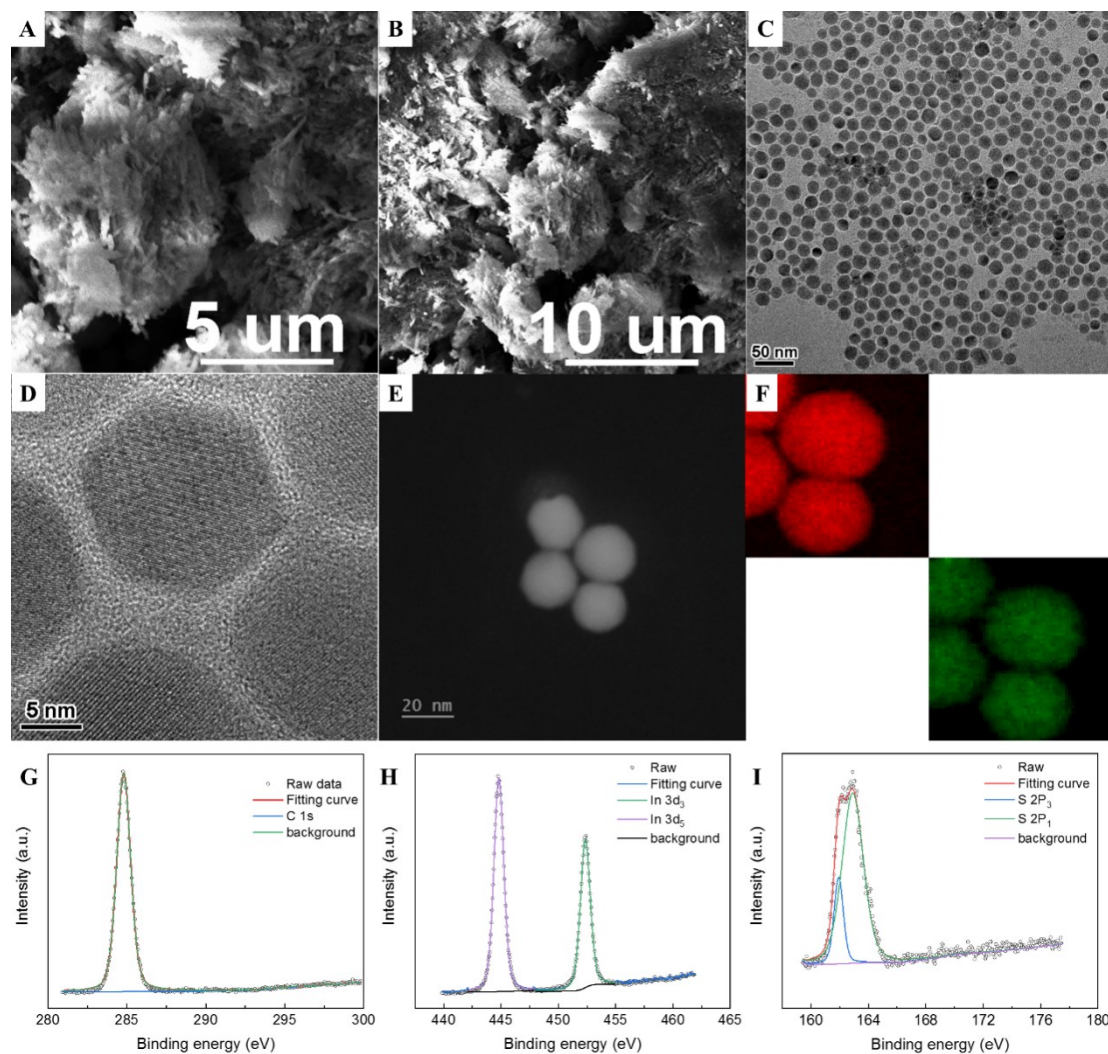

**Figure S5.** A), B) SEM images of  $\text{In}_2\text{S}_3$  sample in different magnetic resolution. C), D) TEM images of  $\text{In}_2\text{S}_3$  sample and E) The HAADF-STEM image. F) The corresponding mapping images of  $\text{In}_2\text{S}_3$  sample. G), H), I) XPS spectra of  $\text{In}_2\text{S}_3$  sample for In 3d and S 2p, respectively.

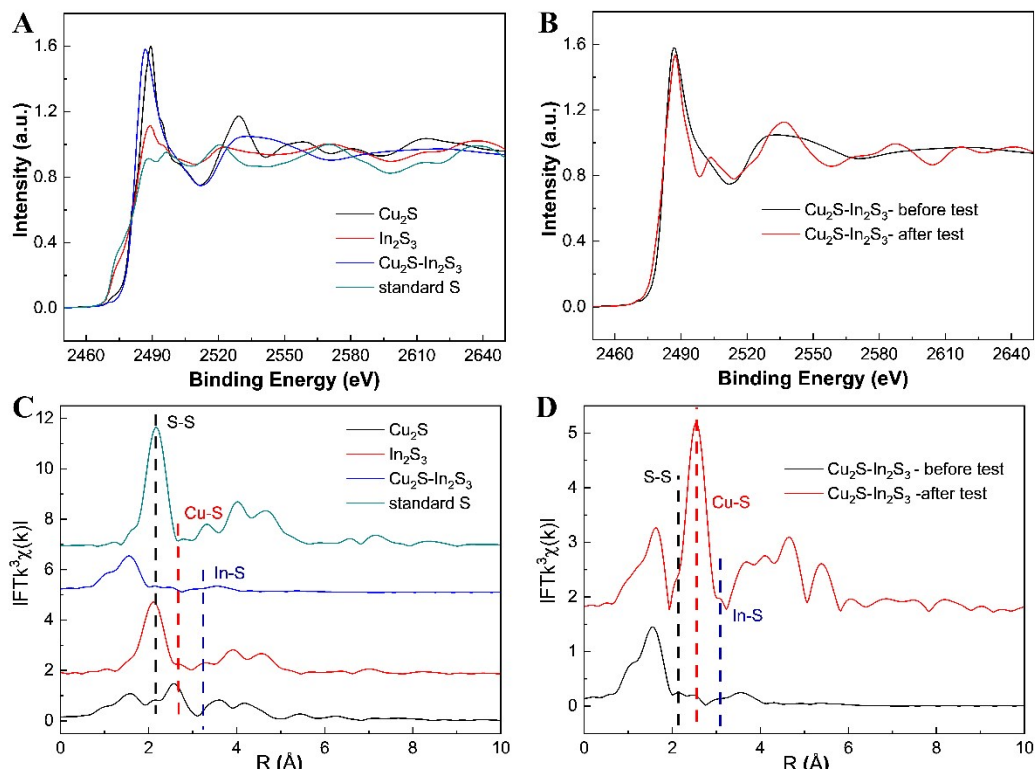

**Figure S6. A)** S K-edge XANES spectra of  $\text{Cu}_2\text{S}$ ,  $\text{In}_2\text{S}_3$ ,  $\text{Cu}_2\text{S-In}_2\text{S}_3$ , and S powder. **B)** S K-edge XANES spectra of  $\text{Cu}_2\text{S-In}_2\text{S}_3$  before and after reaction. **C)** EXAFS in  $R$ -space for the  $\text{Cu}_2\text{S}$ ,  $\text{In}_2\text{S}_3$ ,  $\text{Cu}_2\text{S-In}_2\text{S}_3$ , and S powder. **D)** EXAFS in  $R$ -space for the  $\text{Cu}_2\text{S-In}_2\text{S}_3$  before and after reaction.

The Fourier transformed (FT)  $k^3$ -weighted ( $k$ )-function of the EXAFS spectra in  $R$ -space suggested the S species were Cu-S, In-S and S-S, in the samples. The peak at  $\approx 2.45$  Å is attributed to the Cu-S in  $\text{Cu}_2\text{S}$ ,  $\text{Cu}_2\text{S-In}_2\text{S}_3$  and the peak  $\approx 3.43$  Å is ascribed to the In-S in  $\text{In}_2\text{S}_3$ ,  $\text{Cu}_2\text{S-In}_2\text{S}_3$ , whereas the peak at  $\approx 2.08$  Å suggested the S-S in  $\text{Cu}_2\text{S-In}_2\text{S}_3$ .

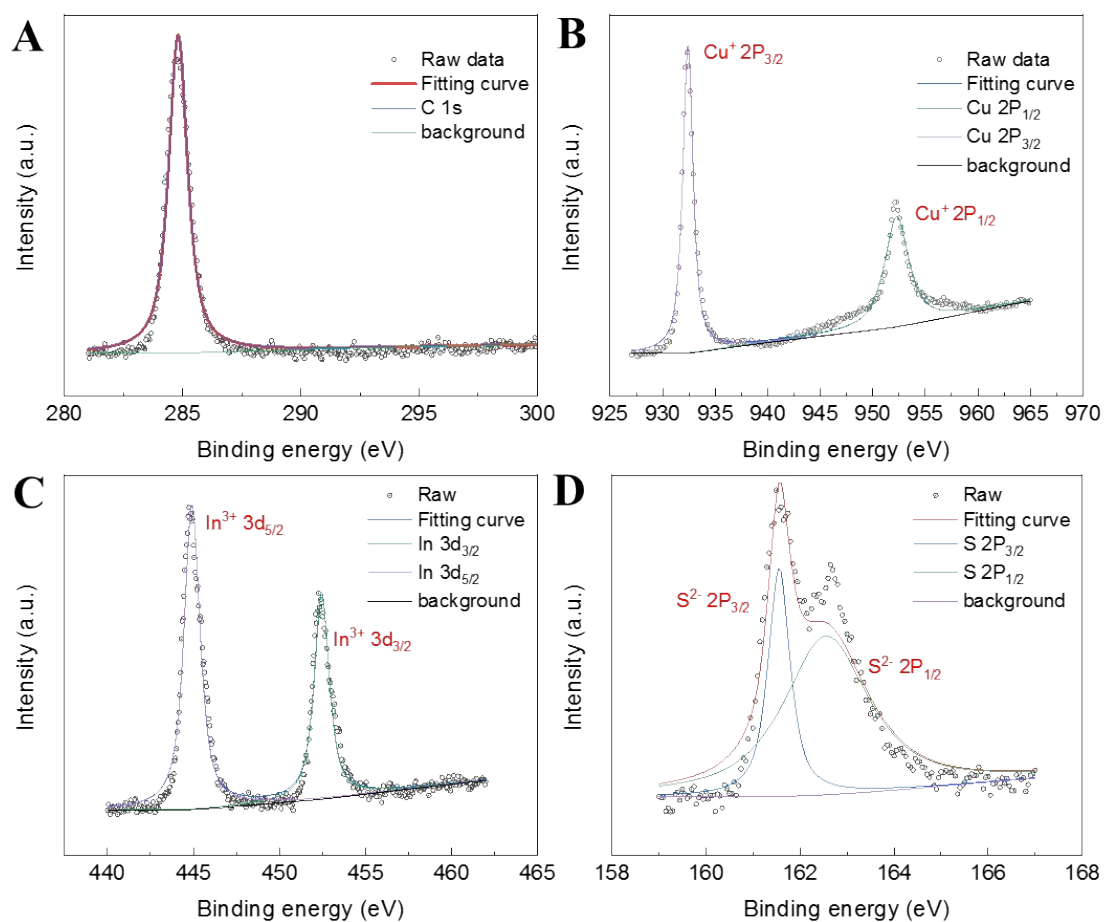

Figure S7. XPS spectra of  $\text{Cu}_2\text{S-In}_2\text{S}_3$  sample for B) Cu 2p, C) In 3d and D) S 2p, respectively.

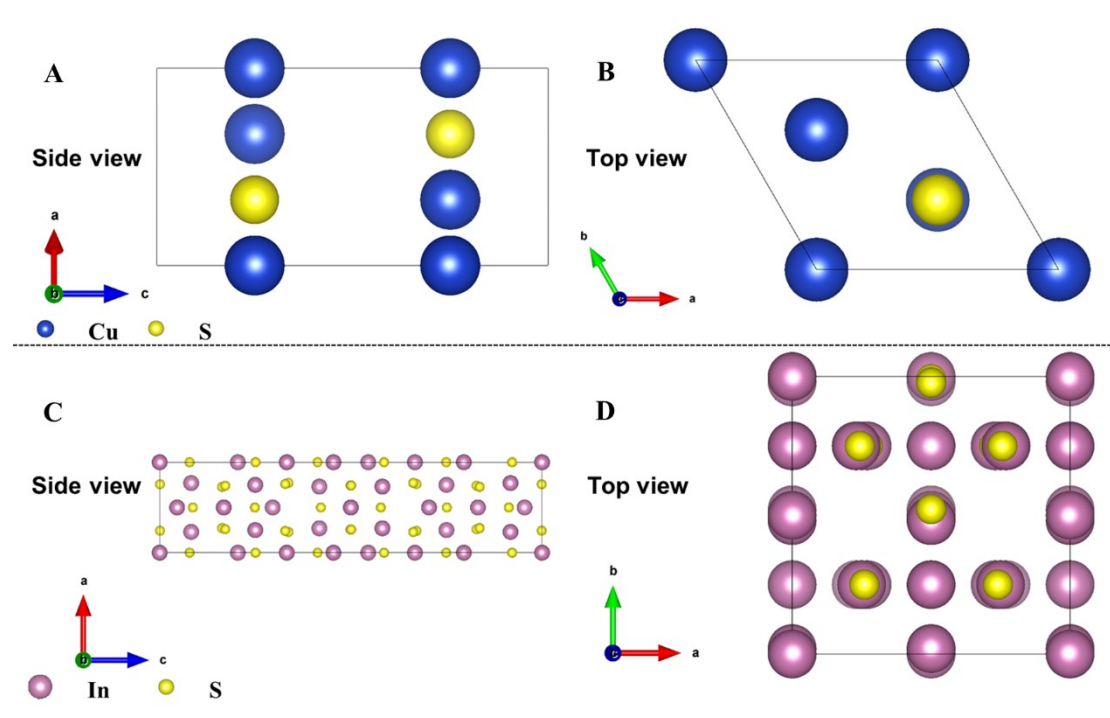

Figure S8. Schematic models for  $\text{Cu}_2\text{S}$  A) side view and B) top view.  $\text{In}_2\text{S}_3$  C) side view and D) top view.

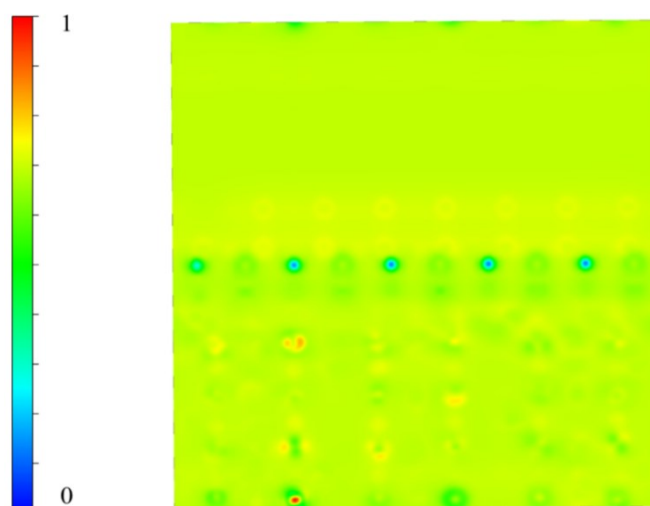

Figure S9. Schematic graph of the built-in electric field formed by the electron transfers from  $\text{In}_2\text{S}_3$  to  $\text{Cu}_2\text{S}$  as the 2D.

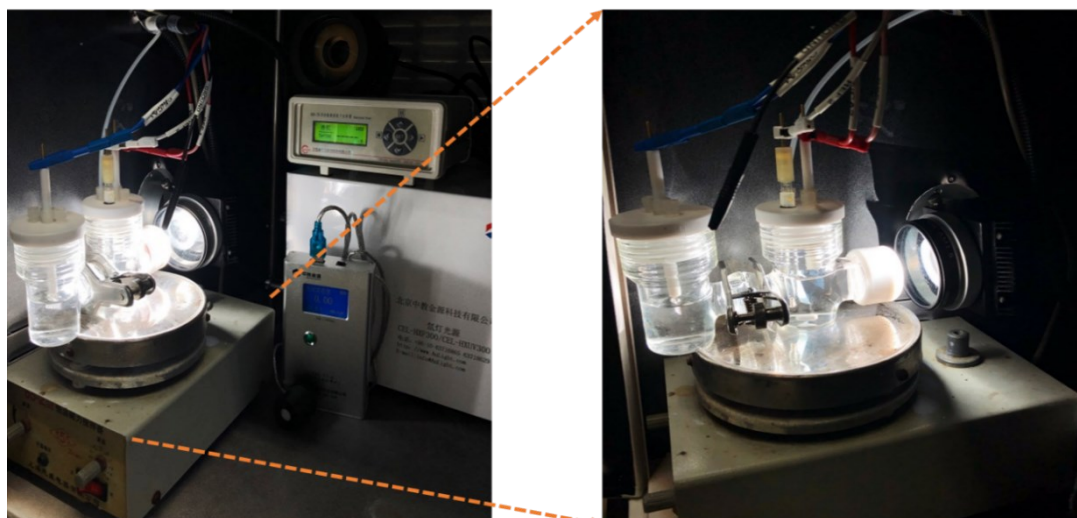

Figure S10. Photograph of the testing conditions.



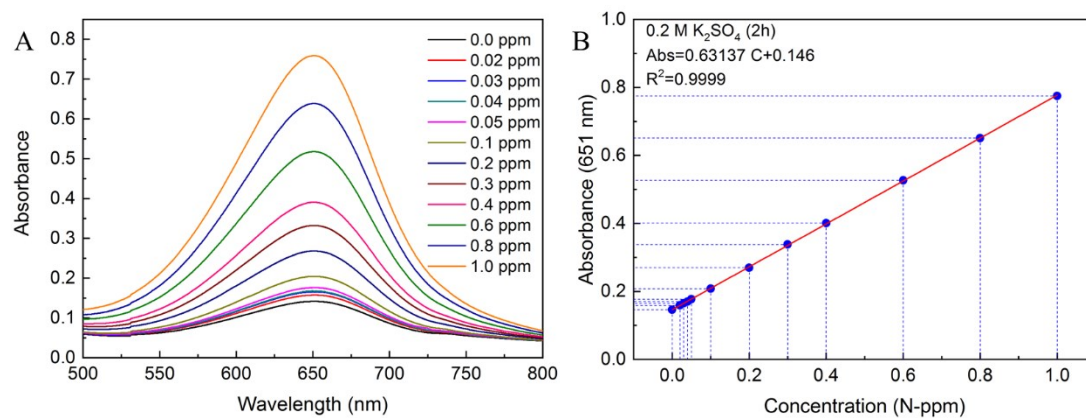

**Figure S11. A) UV-Vis curves of indophenol assays with  $\text{NH}_4^+$  ions after incubated for 2 h at room temperature, B) Calibration curve used for calculation of  $\text{NH}_3$  concentrations.**



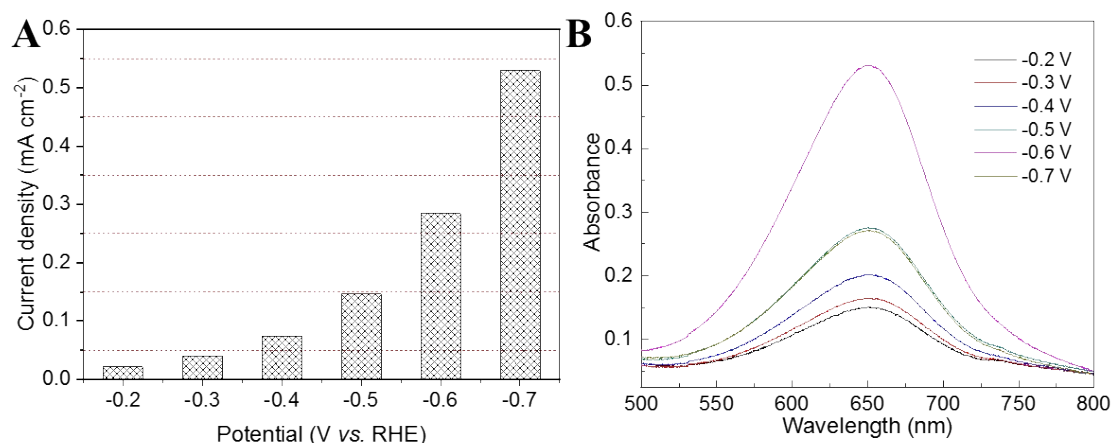

**Figure S12.** A) The current densities for Cu<sub>2</sub>S-In<sub>2</sub>S<sub>3</sub> electrolyzed at different applied potentials under one sunlight. B) UV-Vis curves of indophenol assays with NH<sub>4</sub><sup>+</sup> ions for Cu<sub>2</sub>S-In<sub>2</sub>S<sub>3</sub> electrolyzed at different applied potentials after incubated for 2 h at room temperature.

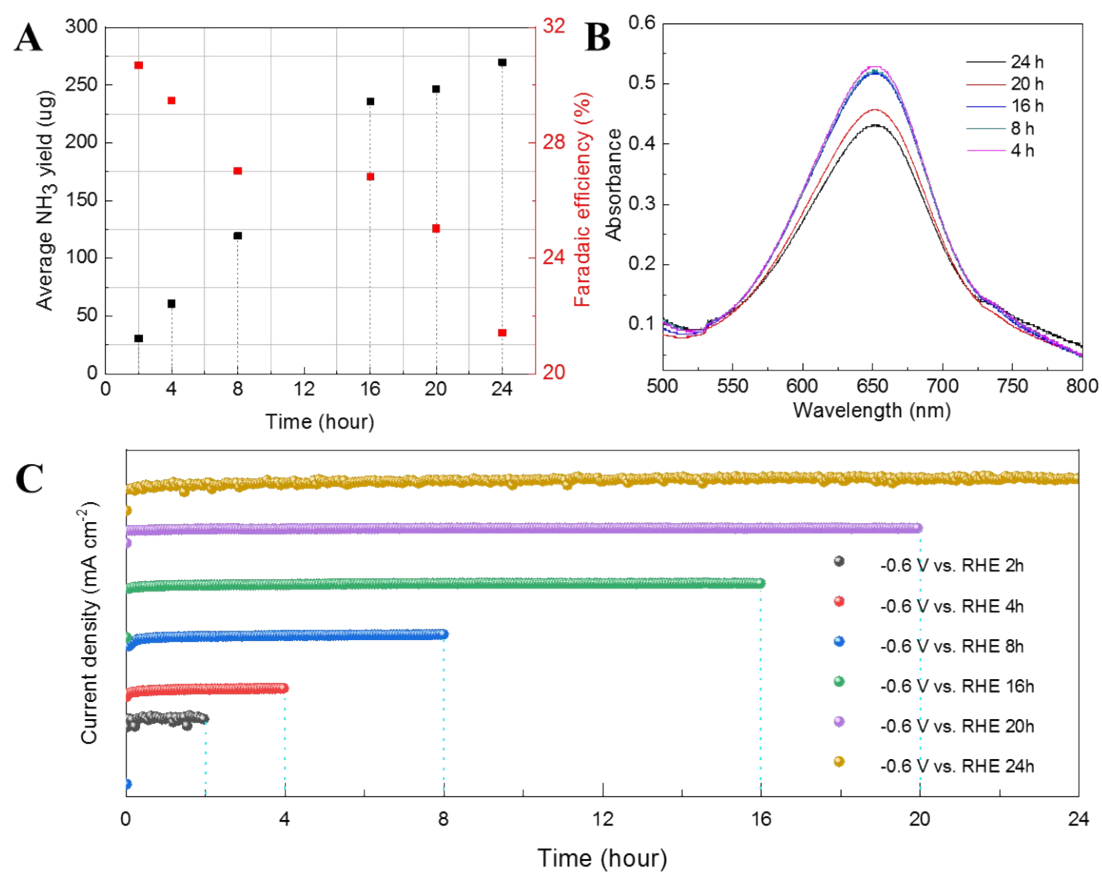

**Figure S13.** A) The average  $\text{NH}_3$  yields and faradaic efficiency under different reaction time. B) The corresponding UV-Vis curves of indophenol assays with  $\text{NH}_4^+$  ions for  $\text{Cu}_2\text{S-In}_2\text{S}_3$  electrolyzed under different reaction time after incubated for 2 h at room temperature. C) The current density stability test under different reaction time.

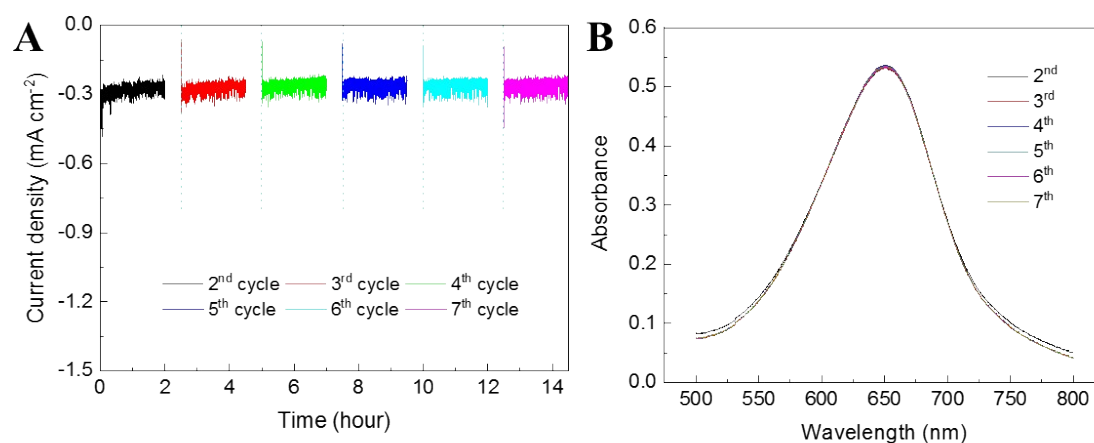

**Figure S14. A) The average  $\text{NH}_3$  yields and faradaic efficiency under different cycle test. B) The corresponding UV-Vis curves of indophenol assays with  $\text{NH}_4^+$  ions for  $\text{Cu}_2\text{S-In}_2\text{S}_3$  electrolyzed under different cycles after incubated for 2 h at room temperature.**

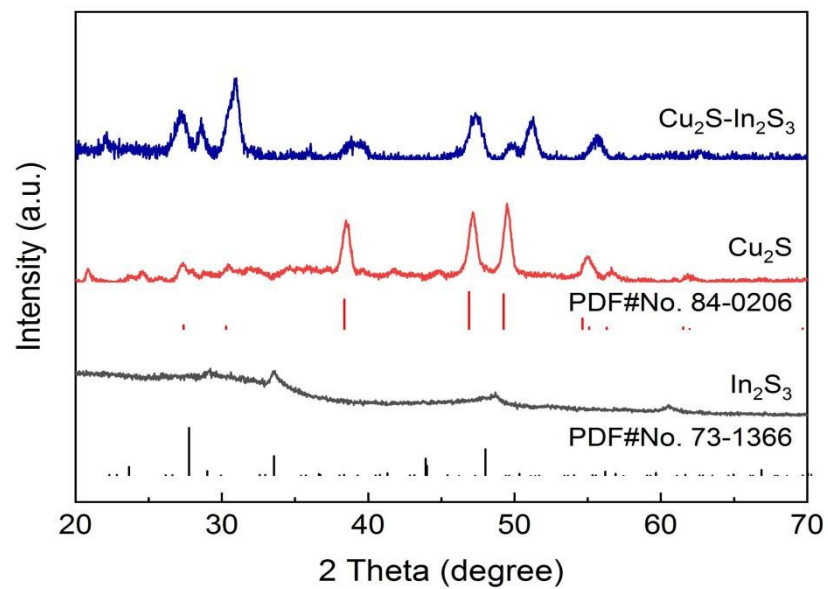

Figure S15. XRD spectra of  $\text{Cu}_2\text{S-In}_2\text{S}_3$  heterostructure,  $\text{Cu}_2\text{S}$  and  $\text{In}_2\text{S}_3$  catalyst after reaction.

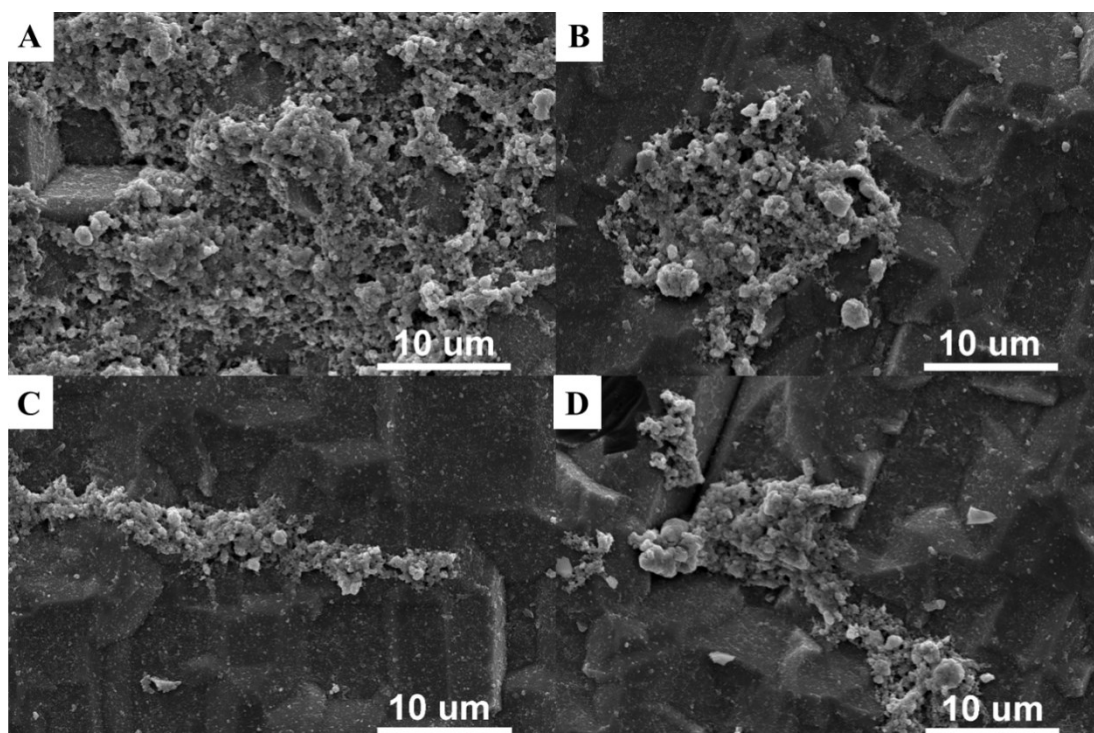

Figure S16. SEM images of  $\text{Cu}_2\text{S-In}_2\text{S}_3$  heterostructure catalyst after reaction.

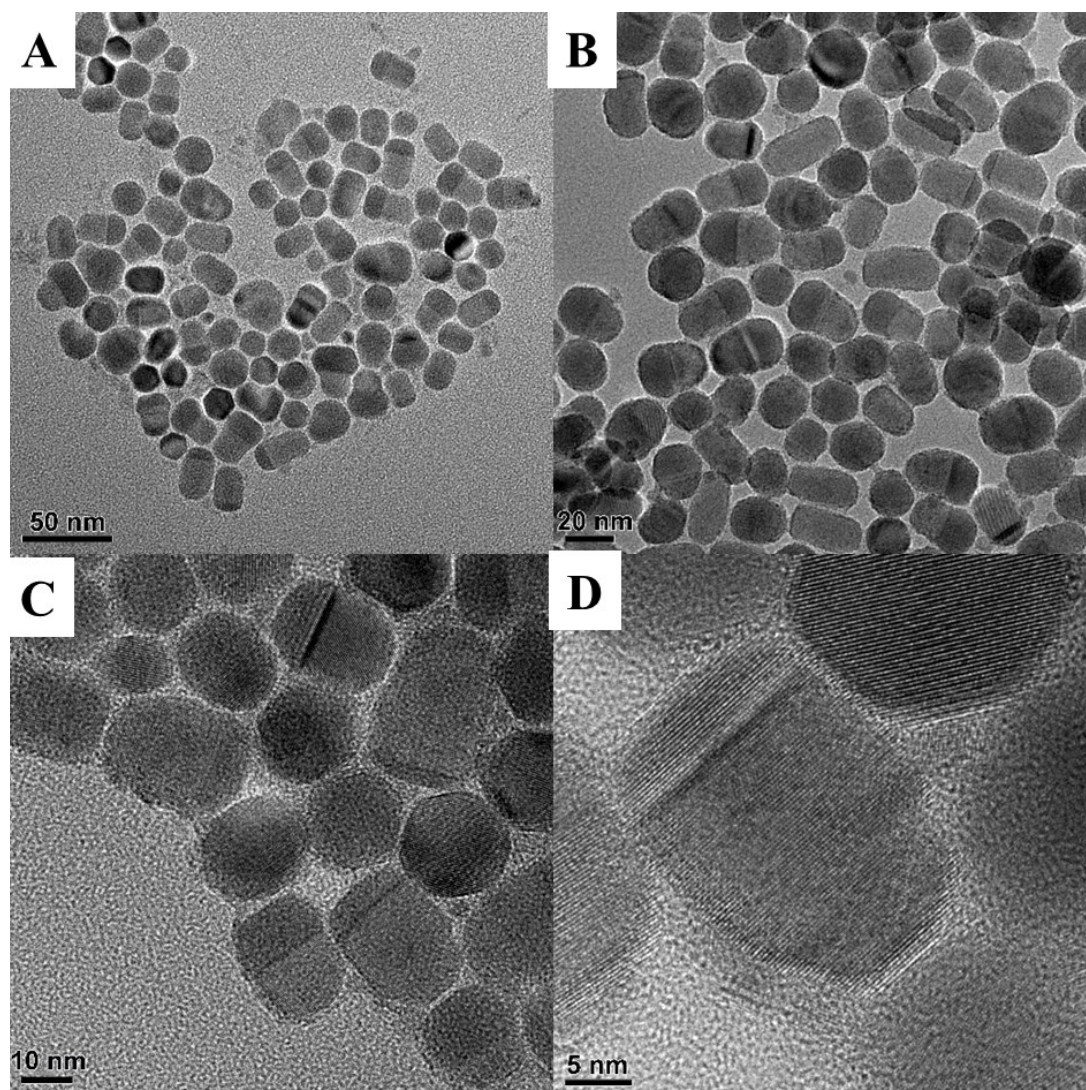

Figure S17. TEM images of  $\text{Cu}_2\text{S-In}_2\text{S}_3$  heterostructure catalyst after reaction.

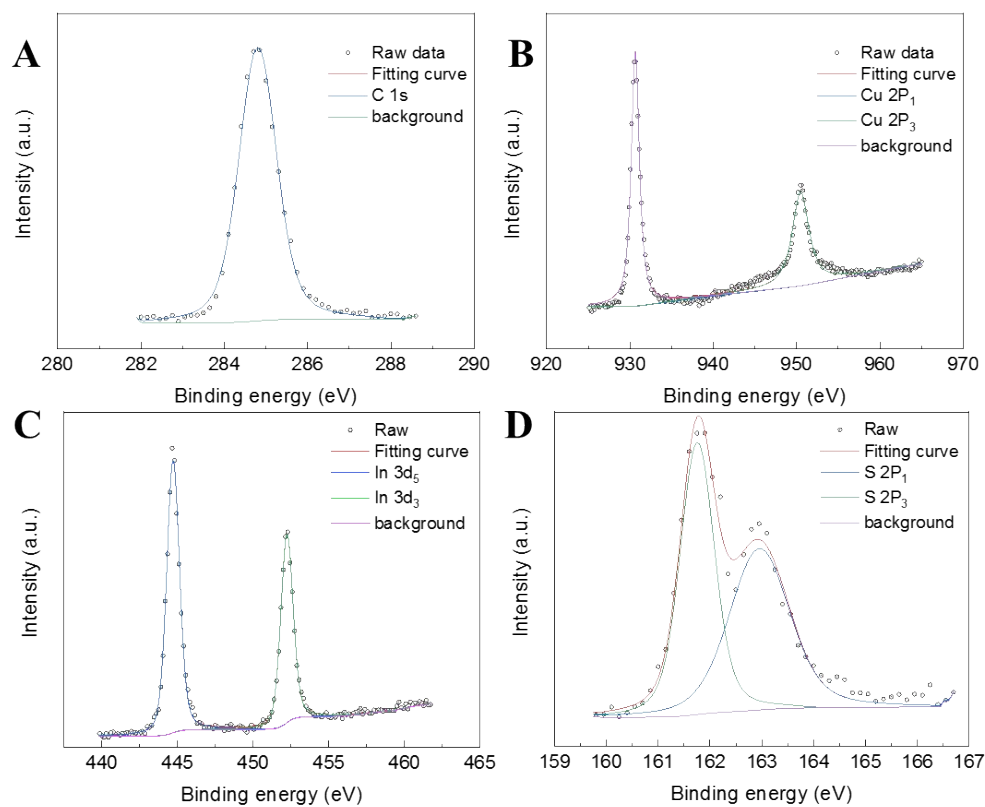

**Figure S18. XPS spectra of Cu<sub>2</sub>S-In<sub>2</sub>S<sub>3</sub> heterostructure catalyst after reaction.**



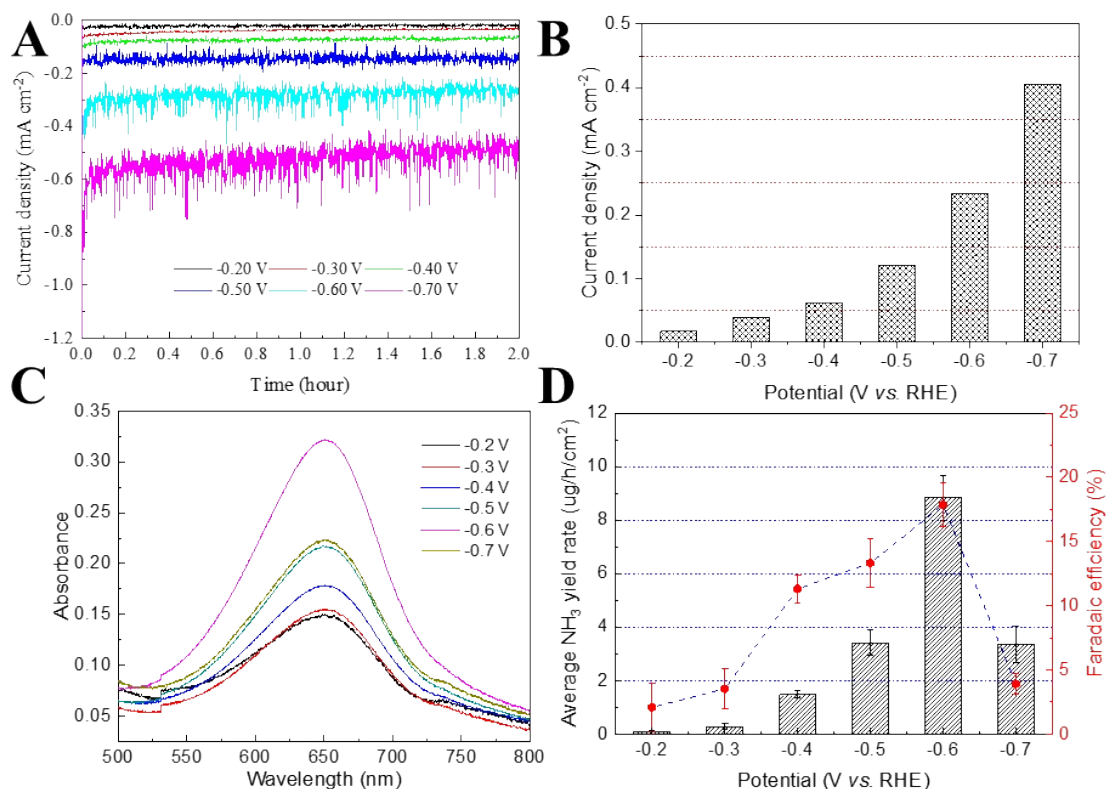

**Figure S19.** A) Chrono-amperometry results at the corresponding potentials. B) The current densities for Cu<sub>2</sub>S electrolyzed at different applied potentials under one sunlight. C) UV-Vis curves of indophenol assays with NH<sub>4</sub><sup>+</sup> ions for Cu<sub>2</sub>S electrolyzed at different applied potentials after incubated for 2 h at room temperature. D) Yield rates of NH<sub>3</sub> (black bar) and Faradaic efficiencies (red point) at each given potential for Cu<sub>2</sub>S catalyst.



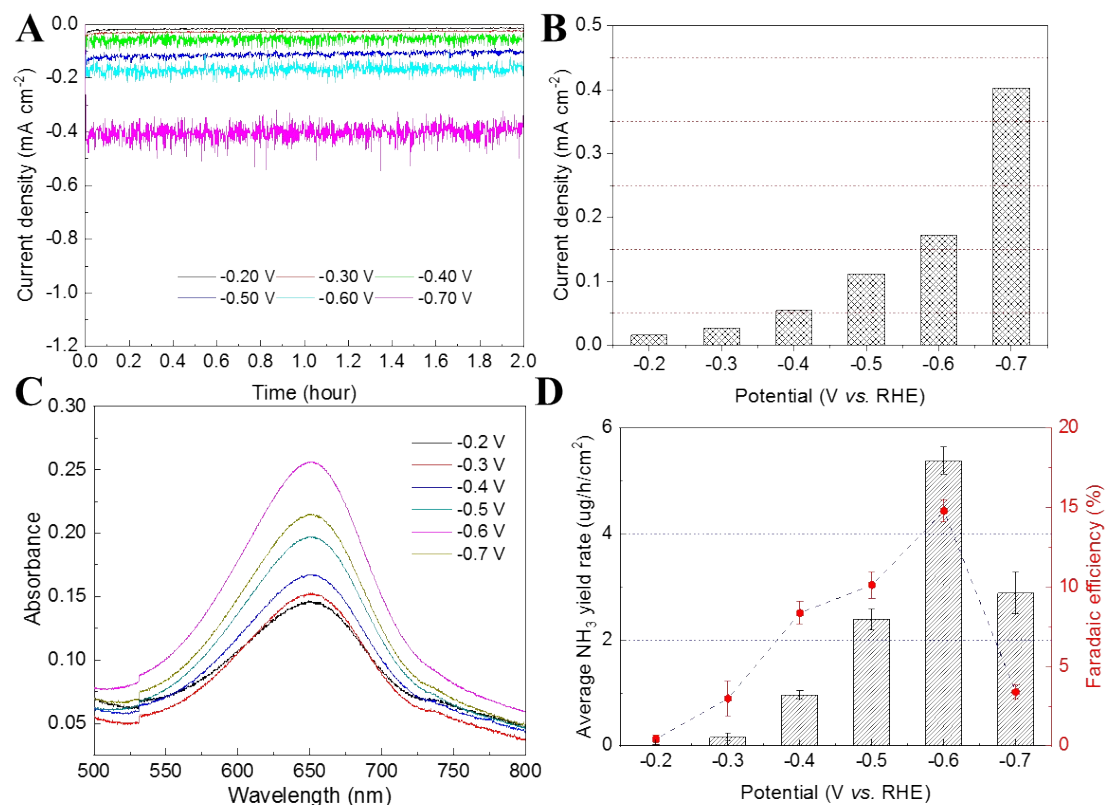

**Figure S20. A) Chrono-amperometry results at the corresponding potentials. B) The current densities for In<sub>2</sub>S<sub>3</sub> electrolyzed at different applied potentials under one sunlight. C) UV-Vis curves of indophenol assays with NH<sub>4</sub><sup>+</sup> ions for In<sub>2</sub>S<sub>3</sub> electrolyzed at different applied potentials after incubated for 2 h at room temperature. D) Yield rates of NH<sub>3</sub> (black bar) and Faradaic efficiencies (red point) at each given potential for In<sub>2</sub>S<sub>3</sub> catalyst.**

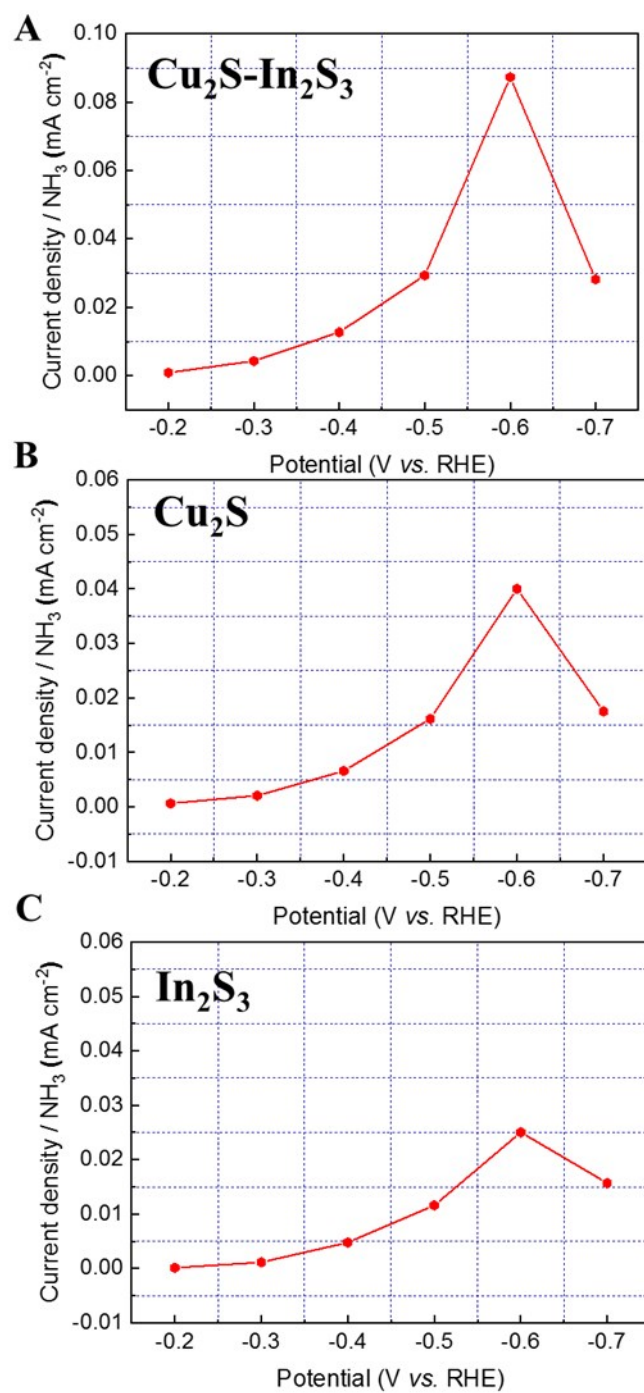

Figure S21. The current densities of Cu<sub>2</sub>S-In<sub>2</sub>S<sub>3</sub> heterostructure, Cu<sub>2</sub>S and In<sub>2</sub>S<sub>3</sub> catalysts for producing ammonia at different applied potential under one sunlight.

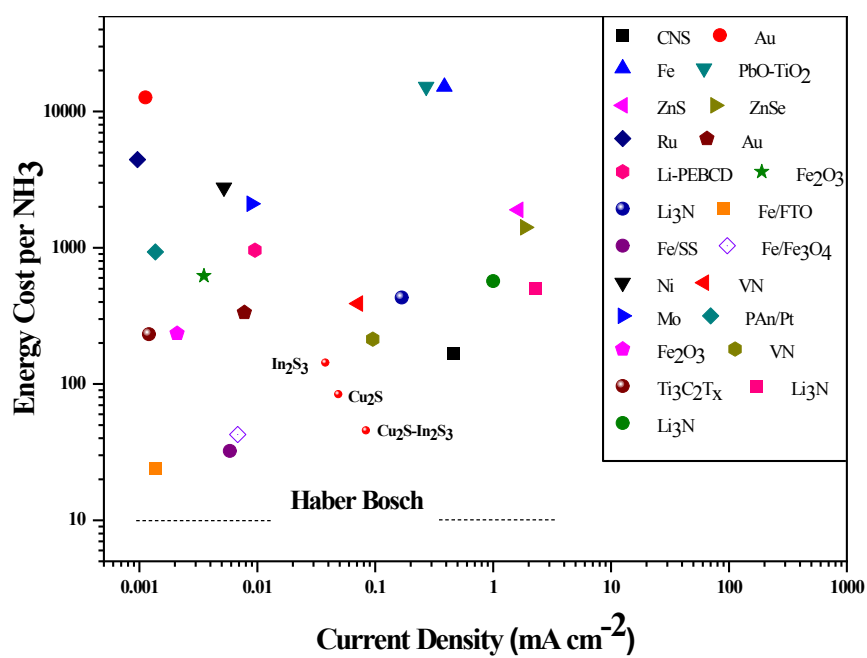

Figure S22. The energy cost per NH<sub>3</sub> at the obtained current density for the reported catalysts<sup>1</sup>.

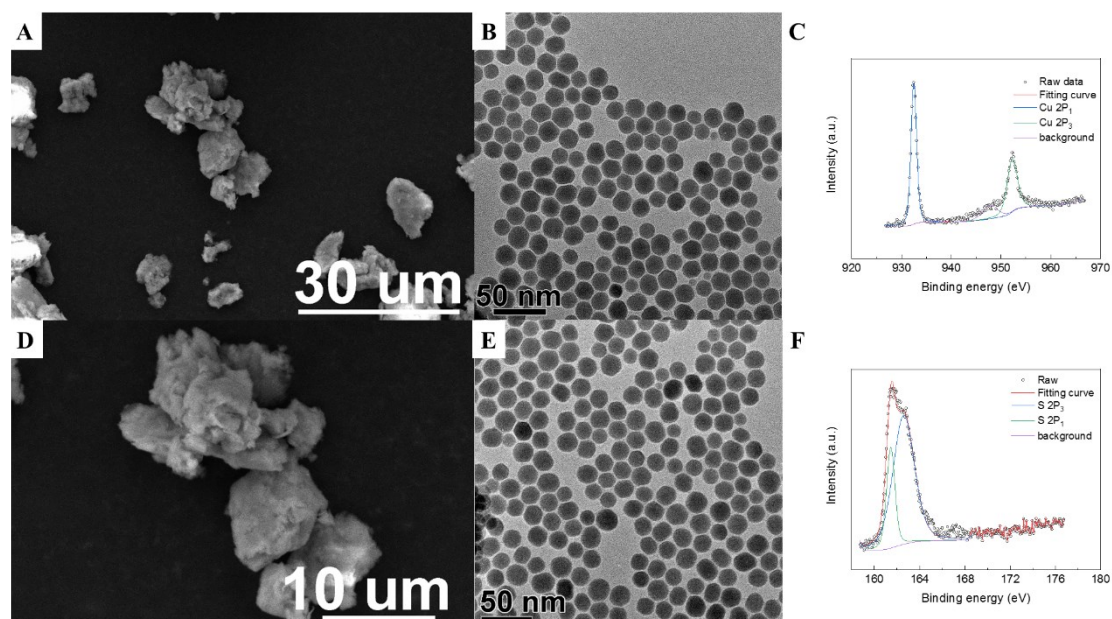

**Figure S23.** A) and B) SEM images of  $\text{Cu}_2\text{S}$  catalyst after reaction. C) and D) TEM images of  $\text{Cu}_2\text{S}$  catalyst after reaction. E) and F) XPS spectra of  $\text{Cu}_2\text{S}$  catalyst after reaction.

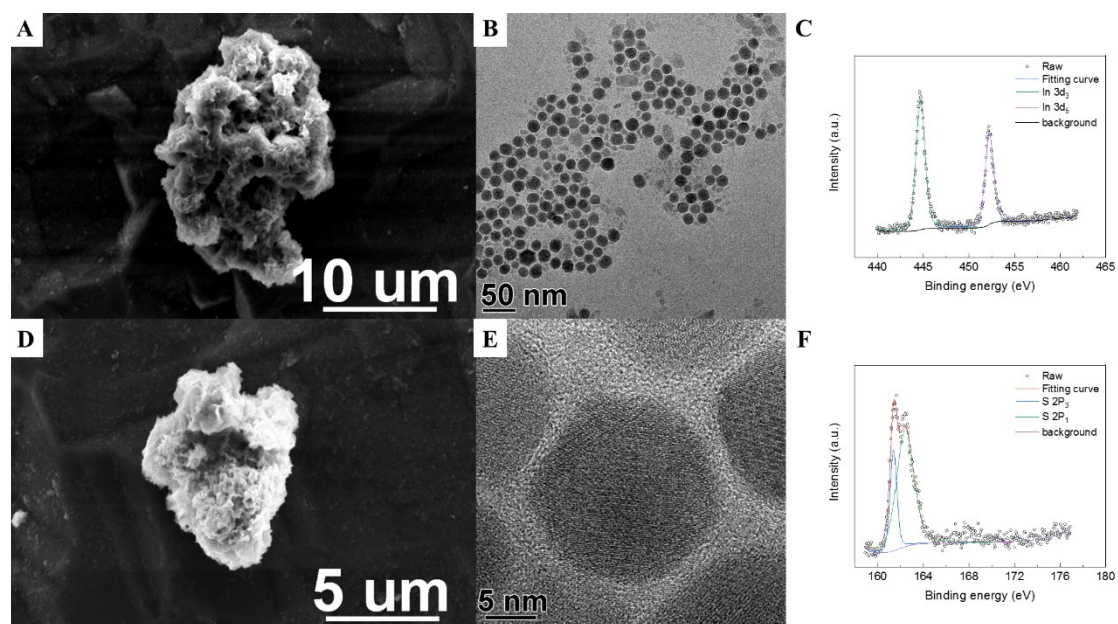

Figure S24. A) and B) SEM images of  $\text{In}_2\text{S}_3$  catalyst after reaction. C) and D) TEM images of  $\text{In}_2\text{S}_3$  catalyst after reaction. E) and F) XPS spectra of  $\text{In}_2\text{S}_3$  catalyst after reaction.

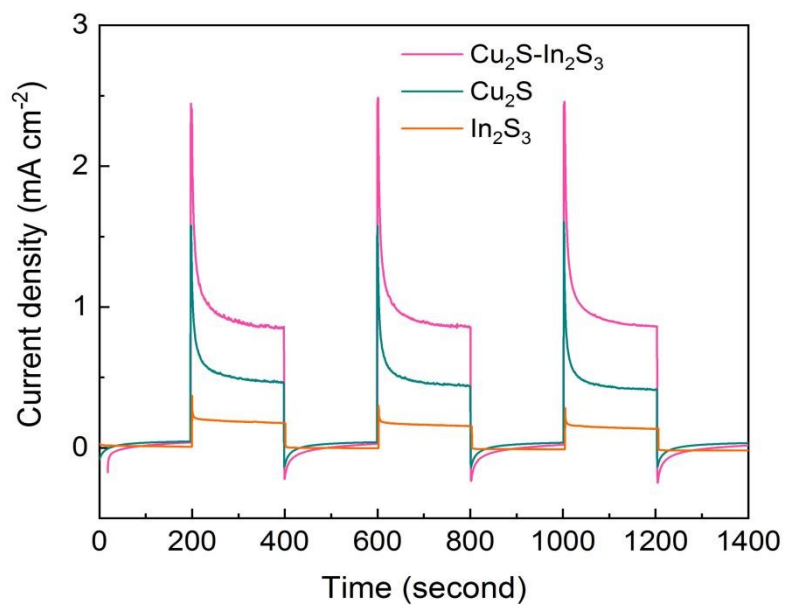

Figure S25. Transient photocurrent responses under repeated on-off cycles for  $\text{Cu}_2\text{S-In}_2\text{S}_3$  heterostructure,  $\text{Cu}_2\text{S}$  and  $\text{In}_2\text{S}_3$  catalysts.

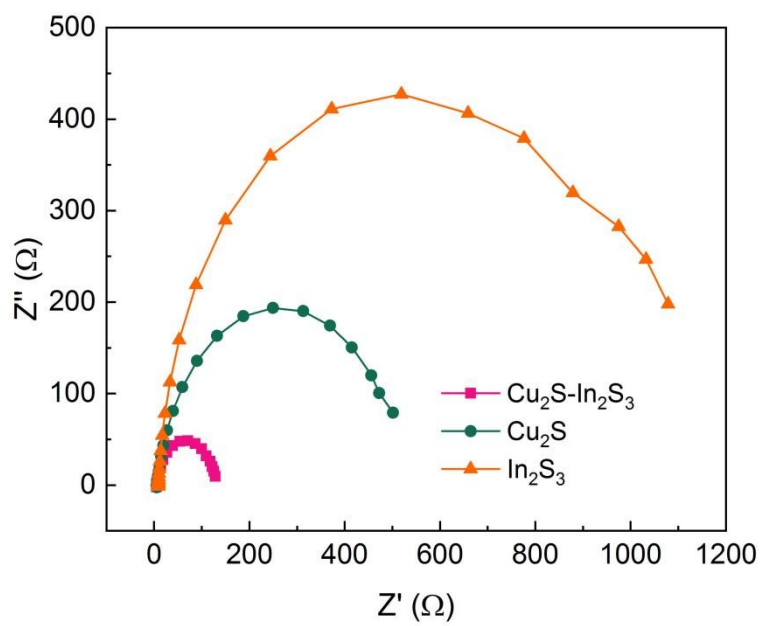

Figure S26. Electrochemical impedance spectra (EIS) for  $\text{Cu}_2\text{S-In}_2\text{S}_3$  heterostructure,  $\text{Cu}_2\text{S}$  and  $\text{In}_2\text{S}_3$  catalysts.

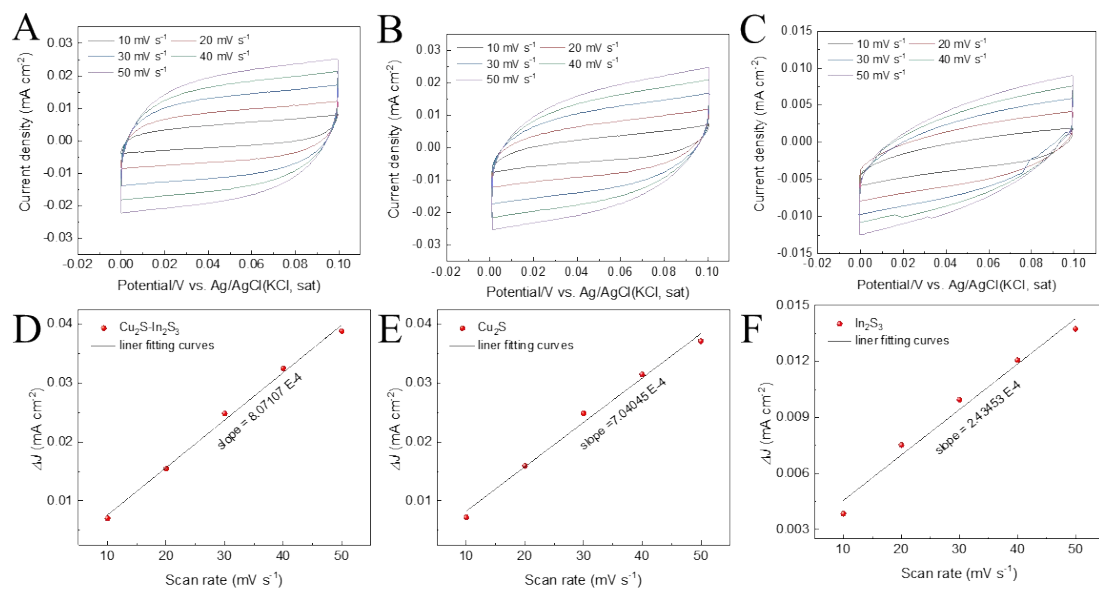

**Figure S27.** Electrochemical surface area measurement of the samples using double-layer capacitance. Cyclic voltammogram scans taken over a range of scan rates in the potential window with mainly double-layer charging and discharging: A)  $\text{Cu}_2\text{S-In}_2\text{S}_3$  heterostructure, B)  $\text{Cu}_2\text{S}$  and C)  $\text{In}_2\text{S}_3$ . D), E) and F) Double-layer charging current vs the scan rate, and the slope of the linear fit is double-layer capacitance.



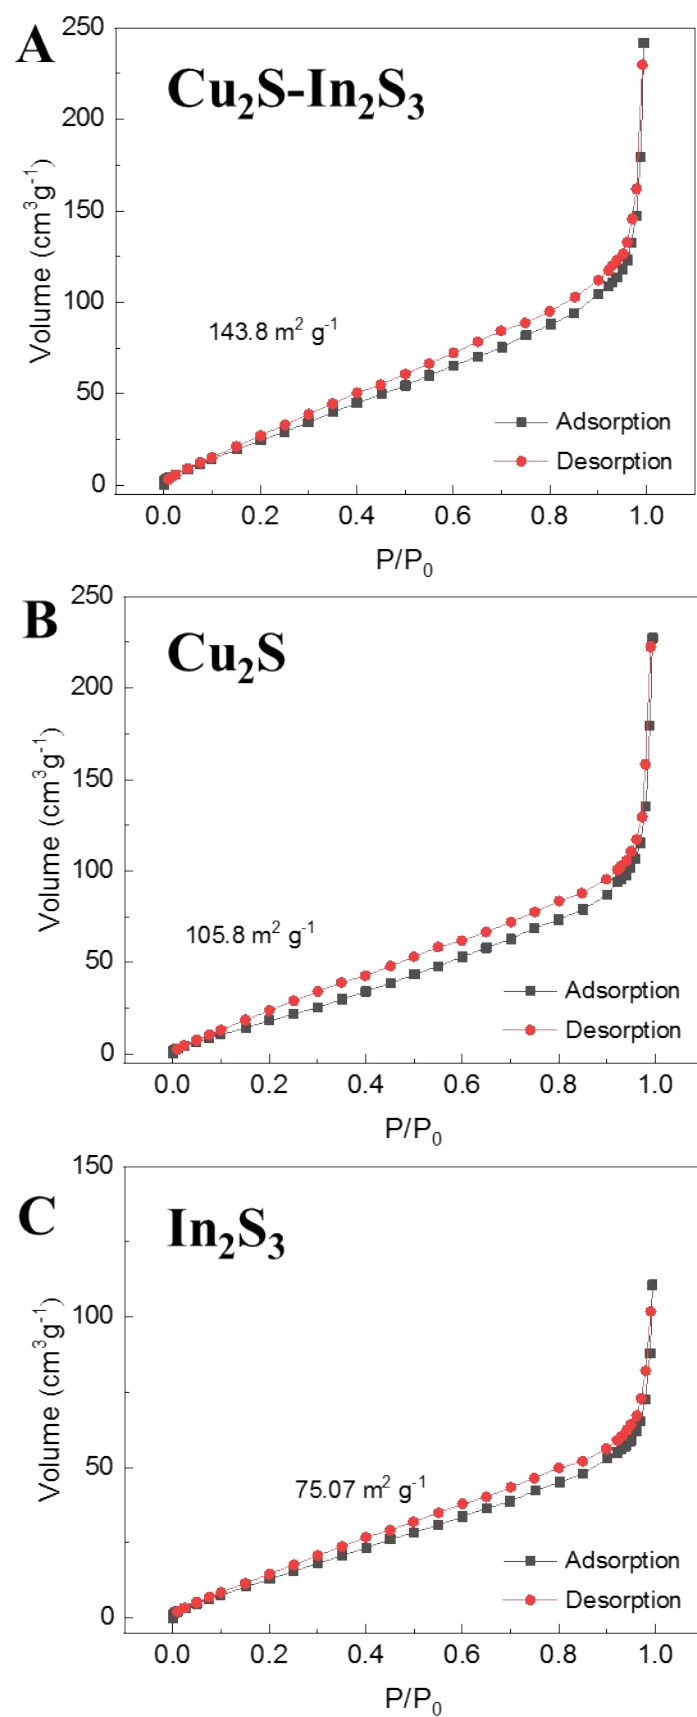

Figure S28.  $\text{N}_2$  adsorption-desorption measurements for  $\text{Cu}_2\text{S-In}_2\text{S}_3$  heterostructure,  $\text{Cu}_2\text{S}$  and  $\text{In}_2\text{S}_3$ .

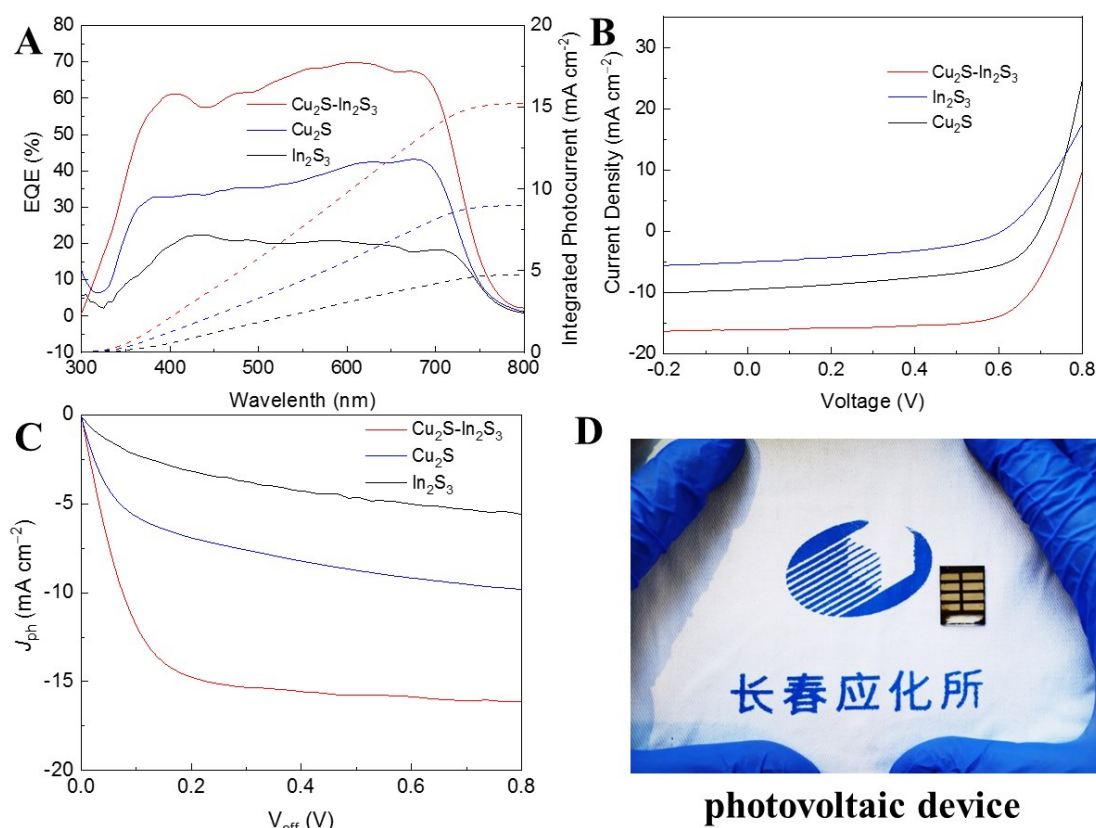

**Figure S29.** Photovoltaic device performance of Cu<sub>2</sub>S-In<sub>2</sub>S<sub>3</sub> heterostructure, Cu<sub>2</sub>S and In<sub>2</sub>S<sub>3</sub>. A) EQE spectra and integrated current of devices. B) J-V curves of champion devices under AM 1.5 G illumination at a scan rate of 0.02 V s<sup>-1</sup> scanning. C) J<sub>ph</sub> vs. V<sub>eff</sub> curves. D) Schematic illustration of the device.

The obtained J-V curves of Cu<sub>2</sub>S, In<sub>2</sub>S<sub>3</sub> and Cu<sub>2</sub>S-In<sub>2</sub>S<sub>3</sub> are scanned under AM 1.5 G illumination at a scan rate of 0.02 V s<sup>-1</sup> in a N<sub>2</sub>-filled glove box, and the statistics of the photovoltaic parameters of these three devices are summarized in **Figure S29A** and **Table S3**. The results of open-circuit voltage (V<sub>oc</sub>), short-circuit current (J<sub>sc</sub>), fill factor (FF), and PCE of devices are listed in Supplementary Table 3. The open-circuit voltage (V<sub>oc</sub>) only decreases to 0.61 V (In<sub>2</sub>S<sub>3</sub>) and 0.70 V (Cu<sub>2</sub>S) from 0.75 V (Cu<sub>2</sub>S-In<sub>2</sub>S<sub>3</sub>) and the corresponding variance percentages are 22.9% and 7.1%, respectively. And the short-circuit current (J<sub>sc</sub>) increased about 2.2 and 0.69 times, respectively, apparently improves from 5.02 mA cm<sup>-2</sup> (In<sub>2</sub>S<sub>3</sub>) and 9.52 mA cm<sup>-2</sup> (Cu<sub>2</sub>S) to 16.10 mA cm<sup>-2</sup> (Cu<sub>2</sub>S-In<sub>2</sub>S<sub>3</sub>), indicating that the fabrication of heterojunction would obviously improve the short circuit current. Meanwhile, the fill factor (FF) also become better. For the control devices, PCE obtained under J-V curves scanning were 1.29% and 3.53%, excitingly, the PCE of Cu<sub>2</sub>S-In<sub>2</sub>S<sub>3</sub>s device significantly increased owing to the simultaneously improved V<sub>oc</sub>, J<sub>sc</sub>, and FF, which could even reach a PCE of 8.31% with a V<sub>oc</sub> of 0.75 V, a J<sub>sc</sub> of 16.05 mA cm<sup>-2</sup>, and an FF of 69%. **Figure S29B** is the external quantum efficiency (EQE) spectra of these three Cu<sub>2</sub>S, In<sub>2</sub>S<sub>3</sub> and Cu<sub>2</sub>S-In<sub>2</sub>S<sub>3</sub> devices, which shows significant improvement from 20% and 40 % to 75 %, owing to the improvement of free charge yield. In addition, the integrated photocurrent densities indicate the same trend and nearly same values with the short current observed in **Figure S29A**. **Figure S29C** shows net photocurrent density (J<sub>ph</sub>) vsrsus effective voltage (V<sub>eff</sub>) curves under AM 1.5 G illumination of the Cu<sub>2</sub>S, In<sub>2</sub>S<sub>3</sub> and Cu<sub>2</sub>S-In<sub>2</sub>S<sub>3</sub> devices, where J<sub>ph</sub> = J<sub>L</sub> - J<sub>d</sub> (J<sub>L</sub> is the current density under AM 1.5 G illumination, J<sub>d</sub> is the dark current density) and V<sub>eff</sub> = V<sub>0</sub> - V (V<sub>0</sub> is the voltage at which J<sub>ph</sub> = 0, V is the applied bias voltage). As is

known,  $J_{ph}$  versus  $V_{eff}$  curves illustrated the dependence of collected photogenerated charge carriers on internal electric field. In short-circuit condition (SCC), where  $V = 0$  V, the  $Cu_2S$ ,  $In_2S_3$  and  $Cu_2S-In_2S_3$  devices showed various  $V_{eff}$  of 0.6057 V, 0.6949 V and 0.7497 V, respectively, suggesting the fabrication of p-n heterojunction could generate bigger  $V_{bi}$ . As a result, the higher  $V_{eff}$  for the  $Cu_2S-In_2S_3$  devices facilitated charge transport and collection, leading to larger  $J_{ph}$  and  $J_{sc}$ . In contrast, the  $Cu_2S$  and  $In_2S_3$  device with lower  $V_{eff}$  gave smaller  $J_{ph}$  and  $J_{sc}$ . It is noted that the change in  $V_{bi}$  was in accordance with the  $V_{oc}$  results obtained from the  $J$ - $V$  curves, suggesting that the enhanced  $V_{bi}$  could lead to a larger upper limit of  $V_{oc}$ . Overall, the enhanced  $V_{bi}$ , and improved charge collection of the  $Cu_2S-In_2S_3$  devices have led to significant improvement in photovoltaic parameters.<sup>2</sup>

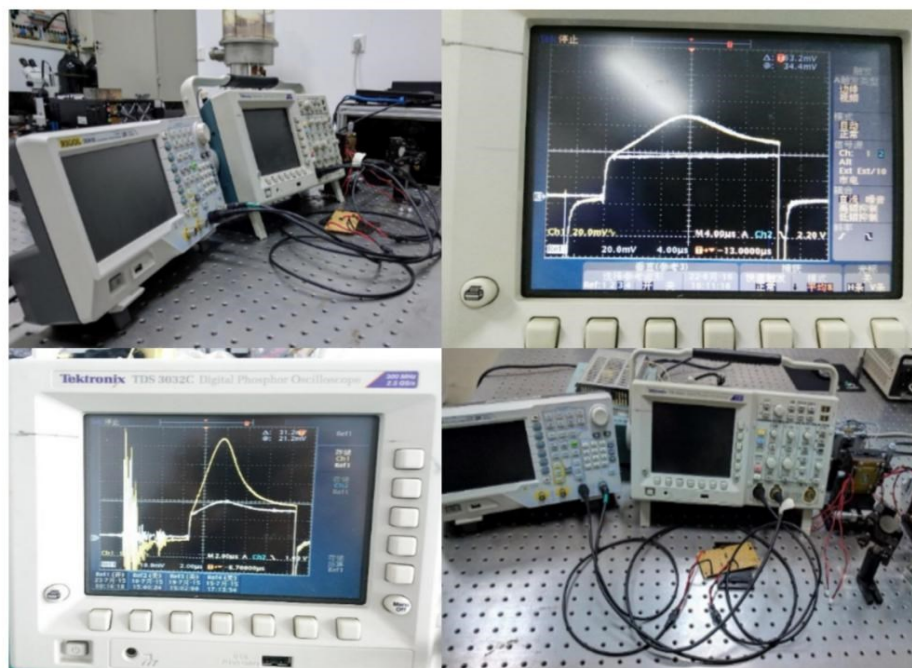

Figure S30. The photos for the photo-CELIV technology system.

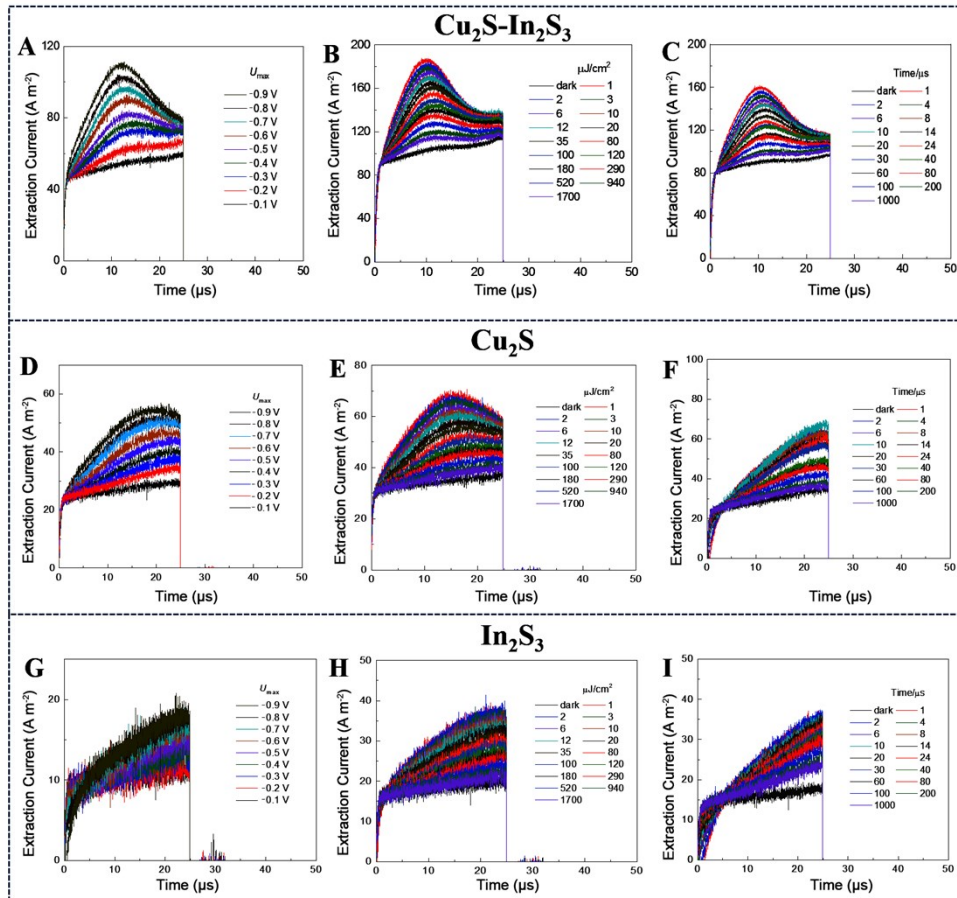

Figure S31. The original measured photo-CELIV curves for A)  $\text{Cu}_2\text{S-In}_2\text{S}_3$ , D)  $\text{Cu}_2\text{S}$  and G)  $\text{In}_2\text{S}_3$  at various applied voltage pulse with different maximum.  $U_{\text{offset}} = -0.6\text{ V}$ ,  $t_{\text{del}} = 5\text{ }\mu\text{s}$ , light pulse =  $80\text{ }\mu\text{J cm}^{-2}$ . The original measured photo-CELIV curves for B)  $\text{Cu}_2\text{S-In}_2\text{S}_3$ , E)  $\text{Cu}_2\text{S}$  and H)  $\text{In}_2\text{S}_3$  at Various incident laser intensities at fixed  $t_{\text{del}} = 5\text{ }\mu\text{s}$  and the voltage pulse  $U_{\text{max}} = 0.6\text{ V}$ ,  $U_{\text{offset}} = -0.6\text{ V}$ . The original measured photo-CELIV curves for C)  $\text{Cu}_2\text{S-In}_2\text{S}_3$ , F)  $\text{Cu}_2\text{S}$  and I)  $\text{In}_2\text{S}_3$  at various delay times ( $t_{\text{del}}$ ) between the light pulse =  $80\text{ }\mu\text{J cm}^{-2}$  and the voltage pulse  $U_{\text{max}} = 0.6\text{ V}$ ,  $U_{\text{offset}} = -0.6\text{ V}$ .

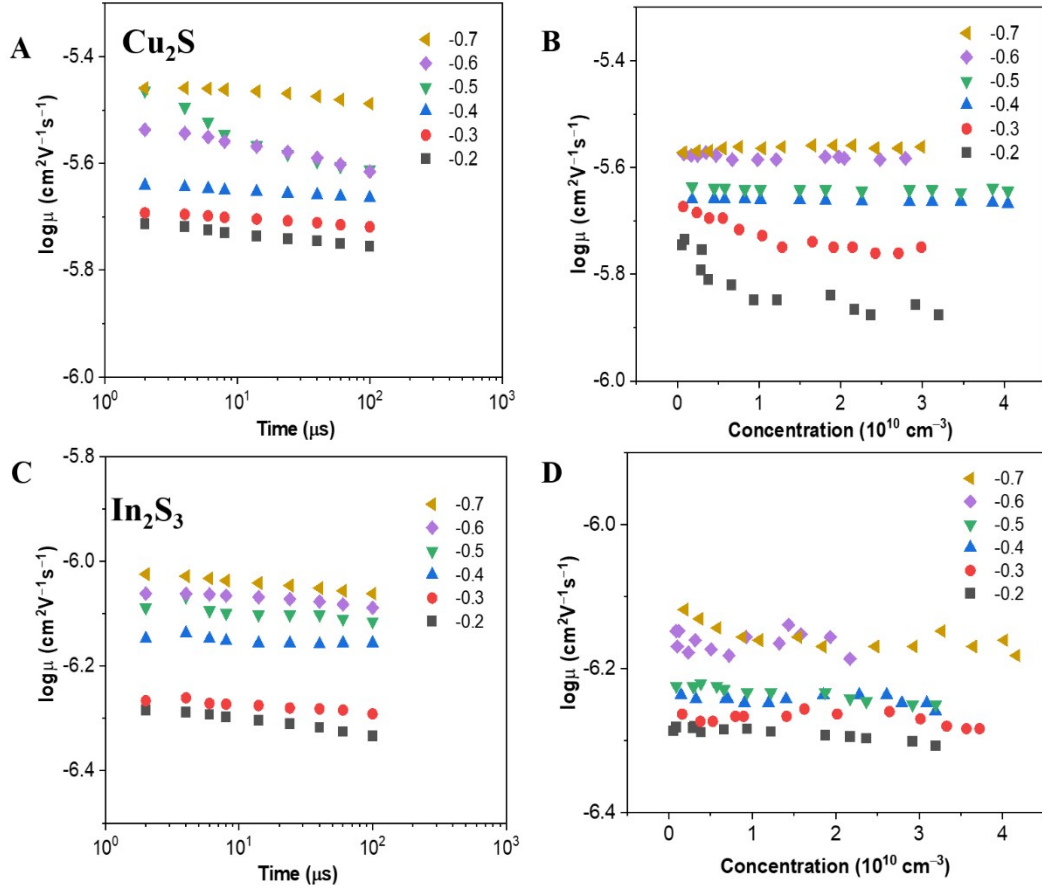

Figure S32. A) Carrier mobility of extracted charge carriers versus the delay time at fixed  $t_{\text{del}} = 5 \mu\text{s}$  for  $\text{Cu}_2\text{S}$ , which is detected at different applied voltage  $U_{\text{offset}} = -0.6\text{V}$ . B) Carrier mobility of  $\text{Cu}_2\text{S}$  versus the concentration of the extracted charge carriers calculated from light intensity dependent measurement at fixed  $t_{\text{del}} = 5 \mu\text{s}$ ,  $U_{\text{offset}} = -0.6\text{V}$ . C) Carrier mobility of extracted charge carriers versus the delay time at fixed  $t_{\text{del}} = 5 \mu\text{s}$  for  $\text{In}_2\text{S}_3$ , which is detected at different applied voltage  $U_{\text{offset}} = -0.6\text{V}$ . D) Carrier mobility of  $\text{In}_2\text{S}_3$  versus the concentration of the extracted charge carriers calculated from light intensity dependent measurement at fixed  $t_{\text{del}} = 5 \mu\text{s}$ ,  $U_{\text{offset}} = -0.6\text{V}$ .

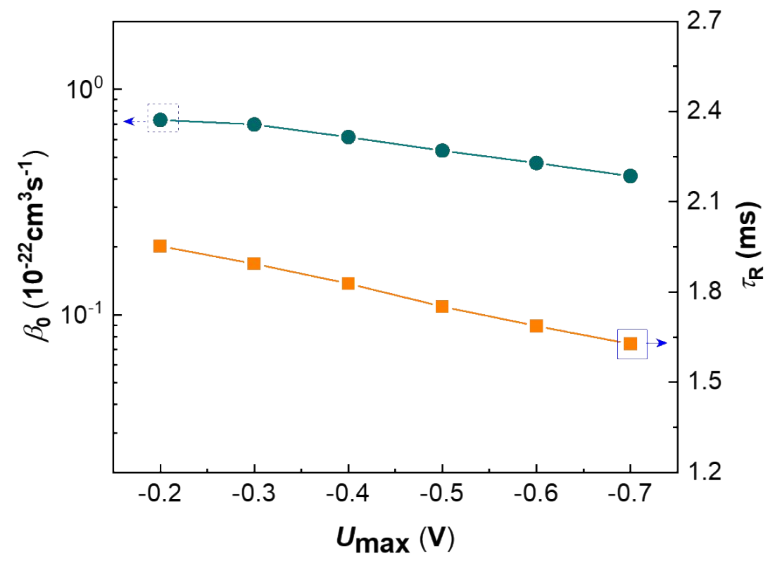

Figure S33. The fitted value of  $\tau_R$  and  $\beta_0$  at different voltage for  $\text{Cu}_2\text{S-In}_2\text{S}_3$  heterostructure.

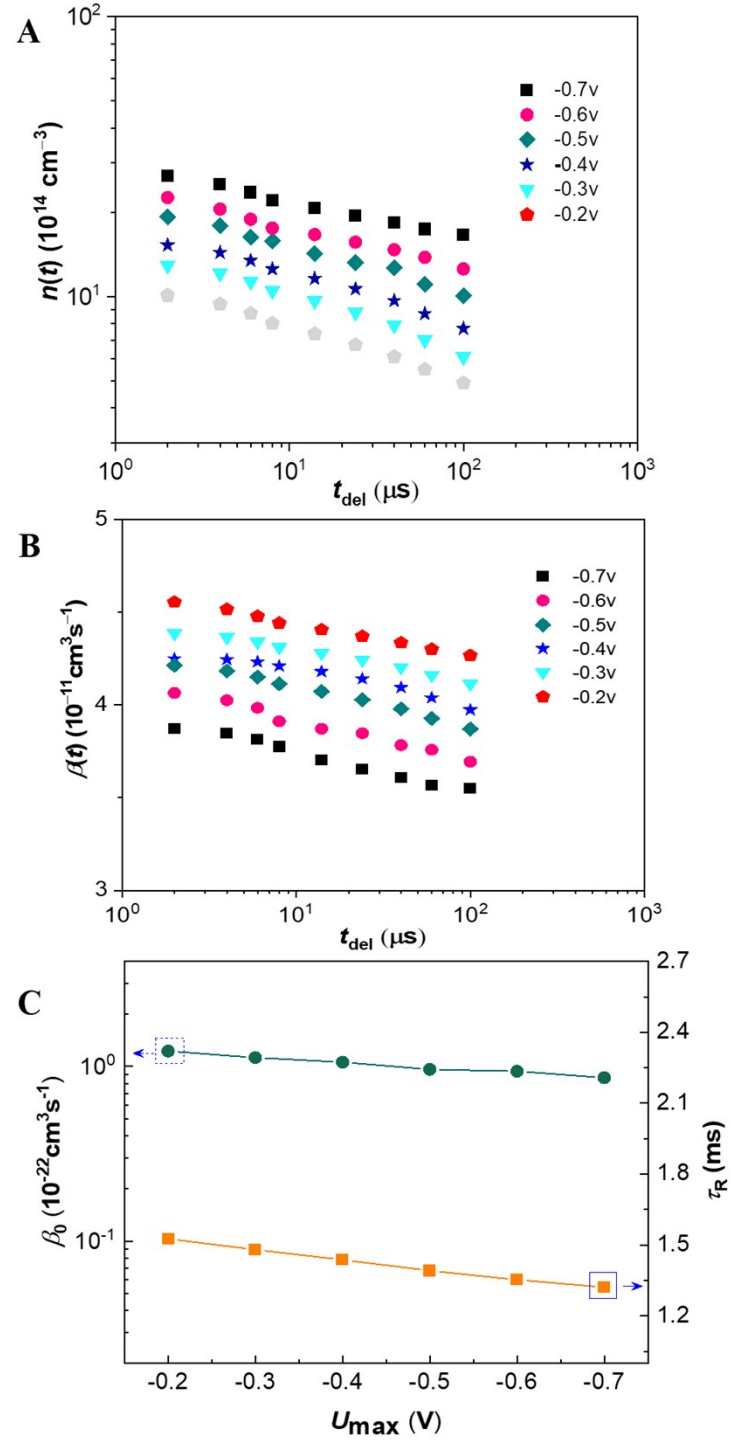

Figure S34. A) Concentration of extracted charge carriers for  $\text{Cu}_2\text{S}$  versus the delay time, which is detected at different applied voltage. B) Time-dependent recombination coefficient of  $\text{Cu}_2\text{S}$ . C) The fitted value of  $\tau_R$  and  $\beta_0$  at different voltage.



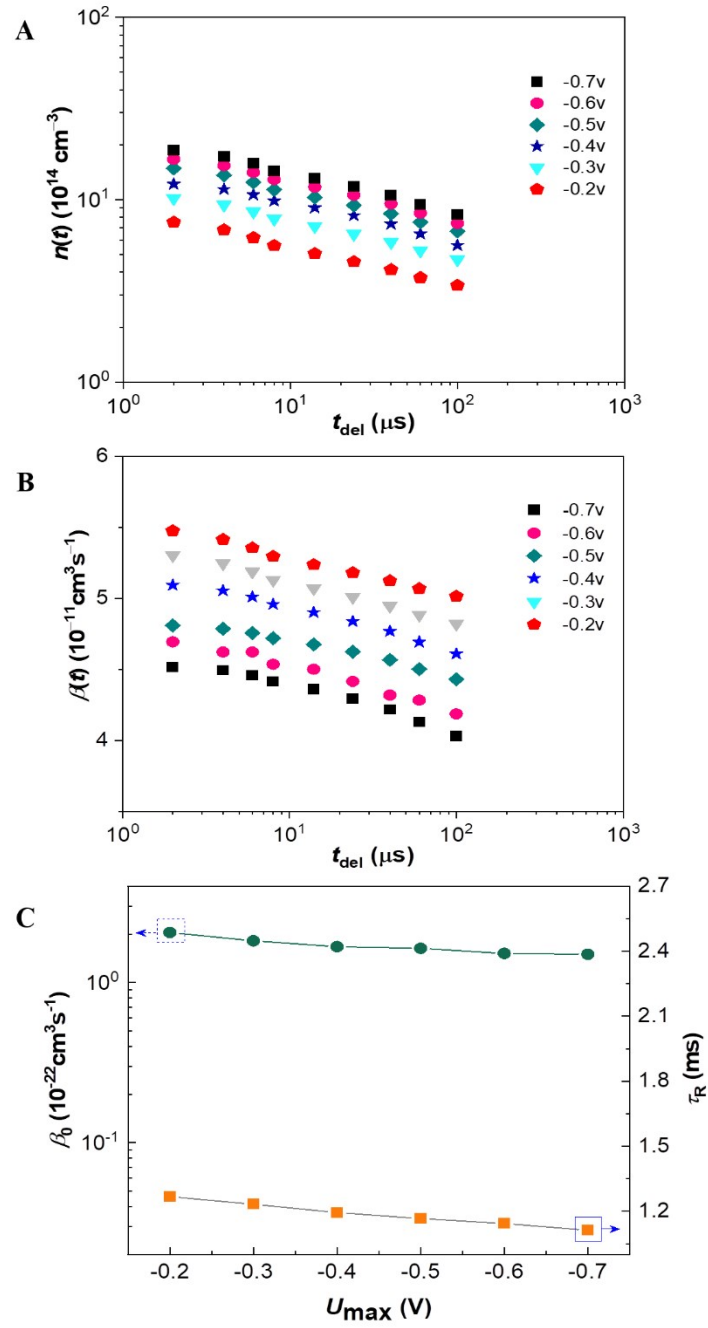

Figure S35. A) Concentration of extracted charge carriers for  $\text{In}_2\text{S}_3$  versus the delay time, which is detected at different applied voltage. B) Time-dependent recombination coefficient of  $\text{In}_2\text{S}_3$ . C) The fitted value of  $\tau_R$  and  $\beta_0$  at different voltage.

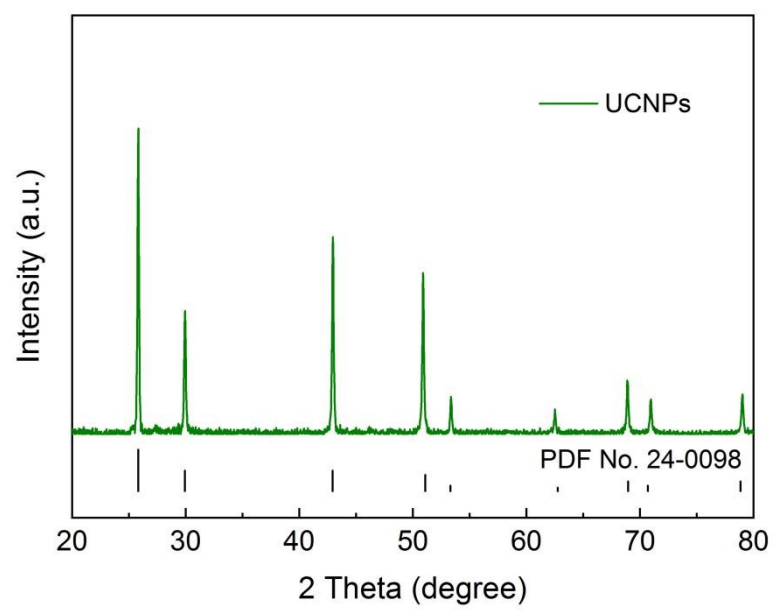

Figure S36. XRD pattern for BaGdF<sub>5</sub>: 30%Yb<sup>3+</sup>, 5%Er<sup>3+</sup> material.

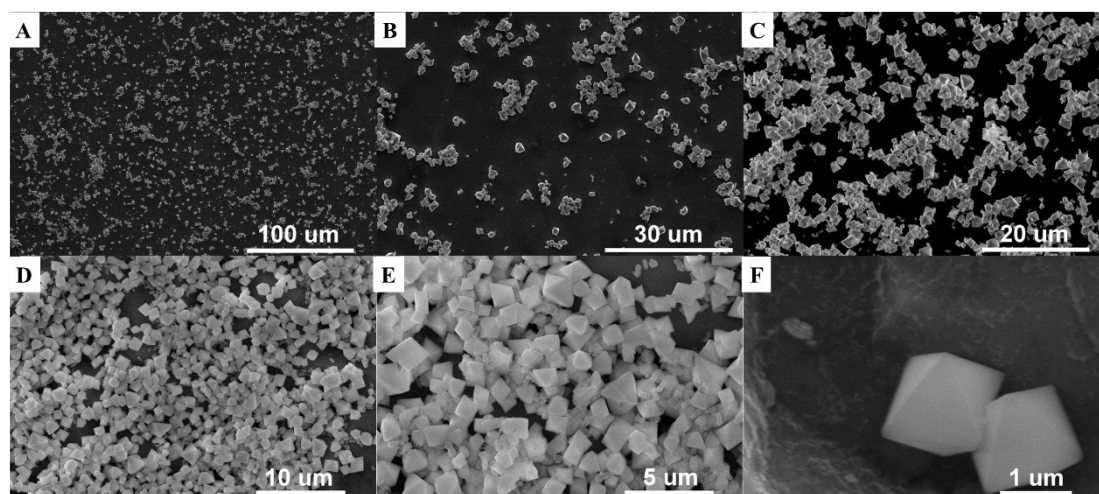

Figure S37. SEM images for BaGdF<sub>5</sub>: 30%Yb<sup>3+</sup>, 5%Er<sup>3+</sup> material.

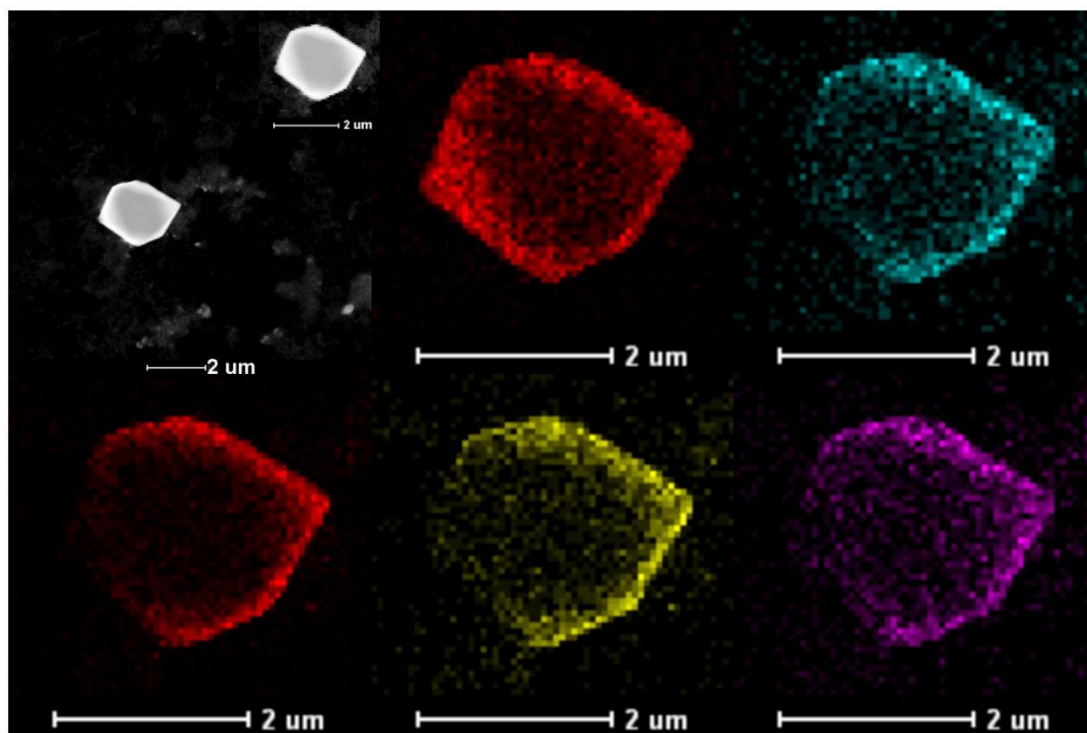

Figure S38. TEM images for  $\text{BaGdF}_5: 30\% \text{Yb}^{3+}, 5\% \text{Er}^{3+}$  material and the corresponding mapping images.

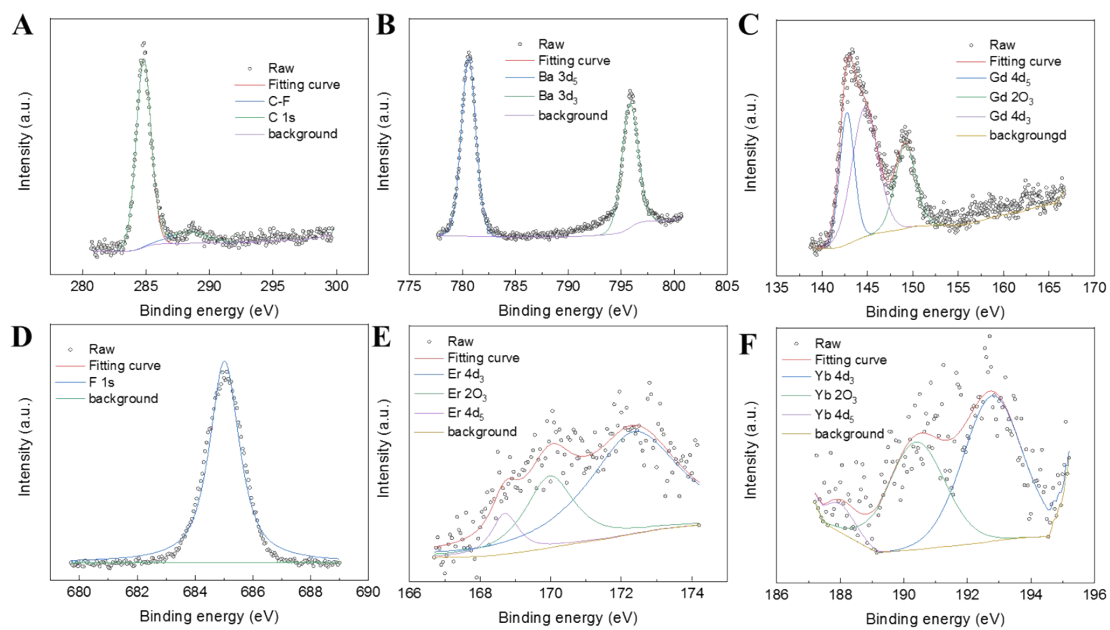

**Figure S39. XPS spectra for BaGdF<sub>5</sub>: 30%Yb<sup>3+</sup>, 5%Er<sup>3+</sup> material.**

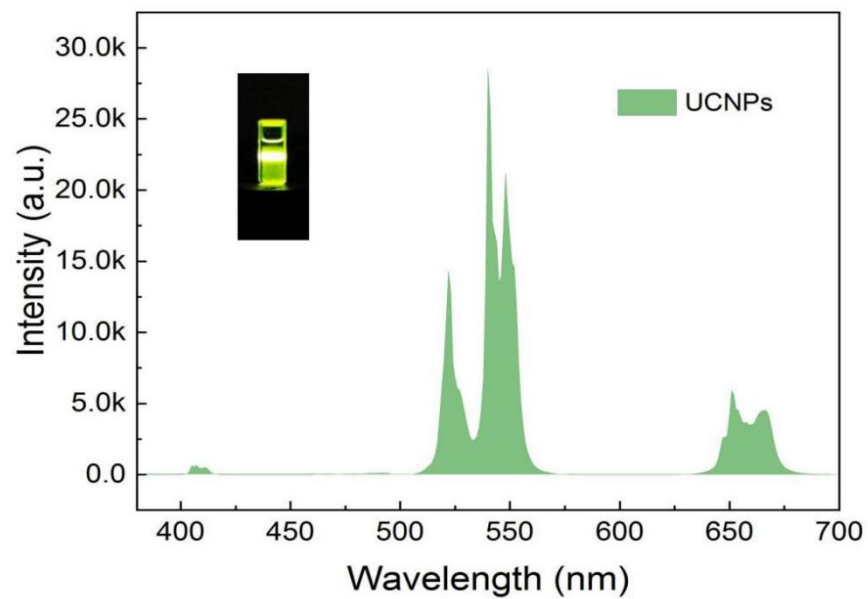

Figure S40. Photoluminescence emission curves of the  $\text{BaGdF}_5: 30\%\text{Yb}^{3+}, 5\%\text{Er}^{3+}$  sample and the inset show the corresponding photo.

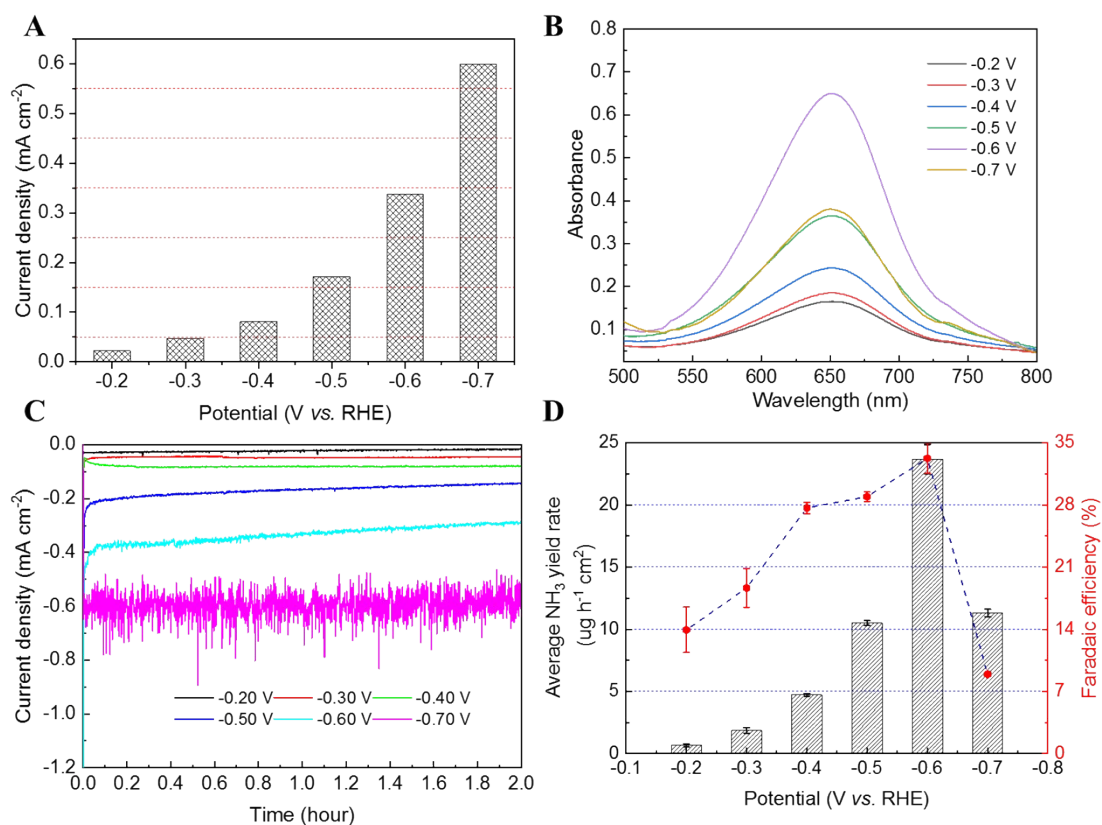

**Figure S41.** A) The current densities for  $\text{Cu}_2\text{S-In}_2\text{S}_3\text{-UCNPs}$  electrolyzed at different applied potentials under one sunlight. B) UV-Vis curves of indophenol assays with  $\text{NH}_4^+$  ions for  $\text{Cu}_2\text{S-In}_2\text{S}_3\text{-UCNPs}$  electrolyzed at different applied potentials after incubated for 2 h at room temperature. C) Chronoamperometry results at the corresponding potentials. D) Yield rates of  $\text{NH}_3$  (black bar) and Faradaic efficiencies (red point) at each given potential for  $\text{Cu}_2\text{S-In}_2\text{S}_3\text{-UCNPs}$  catalyst.

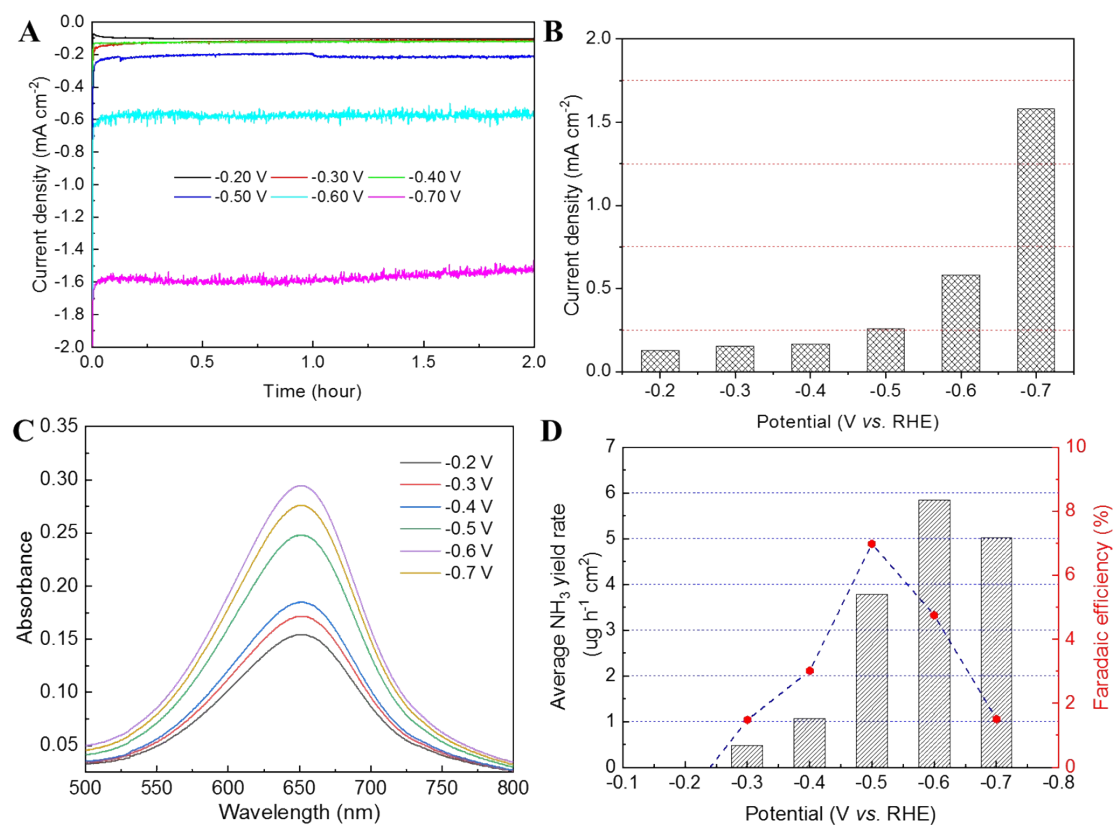

**Figure S42.** A) Chrono-amperometry results at the corresponding potentials. B) The current densities for physically mixed Cu<sub>2</sub>S-In<sub>2</sub>S<sub>3</sub> and UCNPs electrolyzed at different applied potentials under one sunlight. C) UV-Vis curves of indophenol assays with NH<sub>4</sub><sup>+</sup> ions for physically mixed Cu<sub>2</sub>S-In<sub>2</sub>S<sub>3</sub> and UCNPs electrolyzed at different applied potentials after incubated for 2 h at room temperature. D) Yield rates of NH<sub>3</sub> (black bar) and Faradaic efficiencies (red point) at each given potential for physically mixed Cu<sub>2</sub>S-In<sub>2</sub>S<sub>3</sub> and UCNPs catalyst.



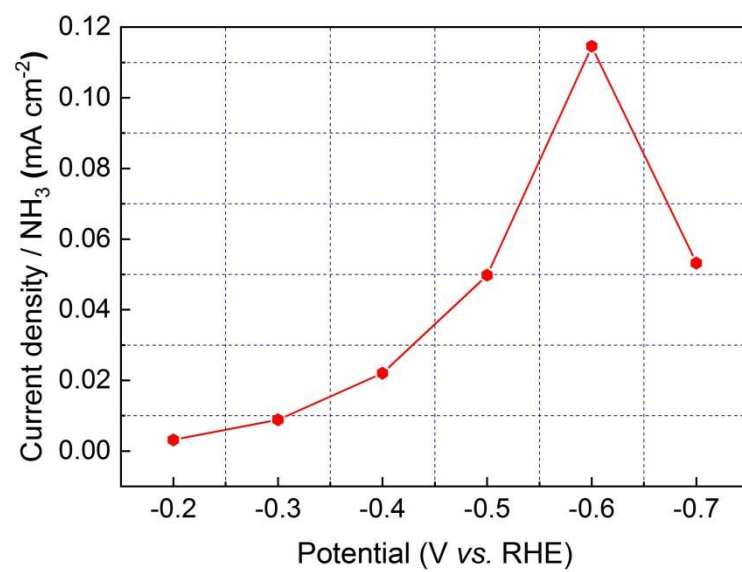

**Figure S43.** The current densities of  $\text{Cu}_2\text{S-In}_2\text{S}_3\text{-UCNPs}$  catalyst for producing ammonia at different applied potential under one sunlight.

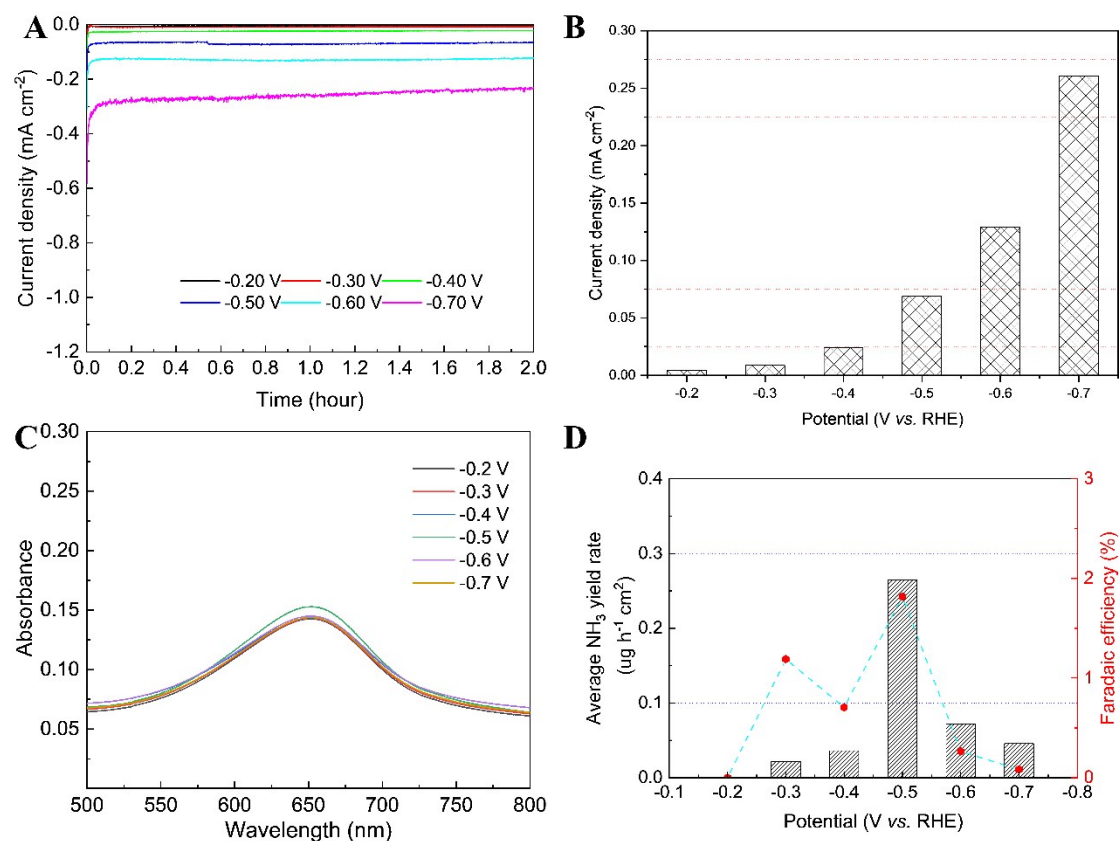

**Figure S44.** A) Chrono-amperometry results at the corresponding potentials. B) The current densities for UCNPs electrolyzed at different applied potentials under one sunlight. C) UV-Vis curves of indophenol assays with  $\text{NH}_4^+$  ions for UCNPs electrolyzed at different applied potentials after incubated for 2 h at room temperature. D) Yield rates of  $\text{NH}_3$  (black bar) and Faradaic efficiencies (red point) at each given potential for UCNPs catalyst.

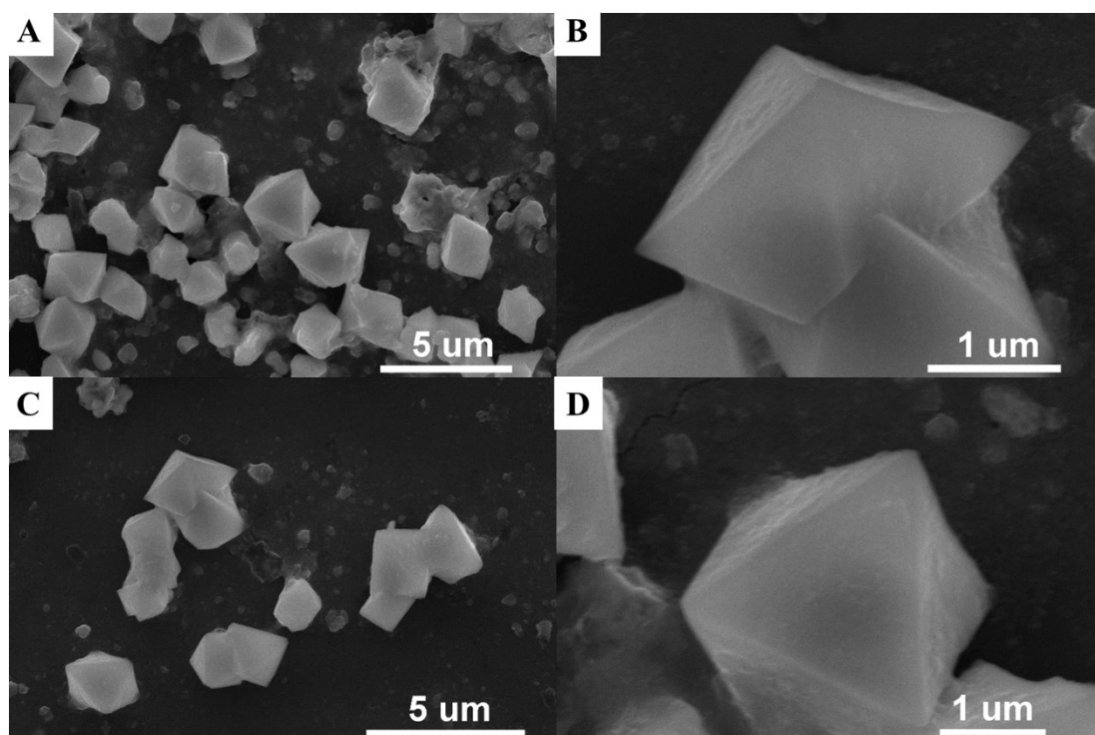

Figure S45. SEM images for BaGdF<sub>5</sub>: 30%Yb<sup>3+</sup>, 5%Er<sup>3+</sup> material after reaction.

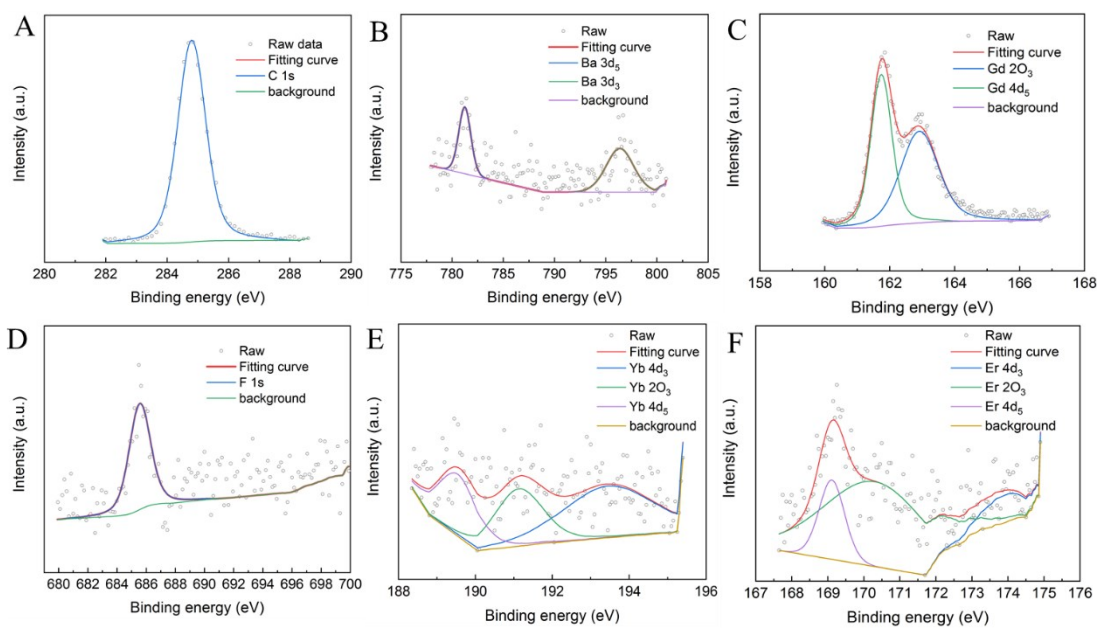

**Figure S46. XPS spectra for BaGdF<sub>5</sub>: 30%Yb<sup>3+</sup>, 5%Er<sup>3+</sup> material after reaction.**

## Supplemental Tables

**Table 1.** Comparison of heterogeneous catalysts for photo(electro)catalytic N<sub>2</sub> reduction.

| Year               | Catalyst                                     | Scavenger                       | Light source               | Ammonia Generation rate                    | Ammonia Detection methods                    | Reference |
|--------------------|----------------------------------------------|---------------------------------|----------------------------|--------------------------------------------|----------------------------------------------|-----------|
| <i>Before 2017</i> | CdS/Pt                                       | None                            | UV                         | 3.26 $\mu\text{mol g}^{-1} \text{h}^{-1}$  | Nessler's reagent                            | 3         |
|                    | 0.2 wt.% Fe-doped TiO <sub>2</sub>           | None                            | UV                         | 11.5 $\mu\text{mol g}^{-1} \text{h}^{-1}$  | Indophenol blue method                       | 4         |
|                    | B-doped diamond                              | None                            | UV                         | 1.8 $\mu\text{g h}^{-1}$                   | Indophenol blue method                       | 5         |
|                    | Au NPs/NbSrTiO <sub>3</sub> /Ru              | Ethanol                         | 550-800 nm                 | 1100 $\mu\text{mol g}^{-1} \text{cm}^{-2}$ | Indophenol blue method                       | 6         |
|                    | BaTiO <sub>3</sub>                           | None                            | UV                         | 0.87 $\mu\text{mol g}^{-1} \text{h}^{-1}$  | Nessler's reagent                            | 7         |
|                    | BiOBr-001-O <sub>v</sub>                     | None                            | $\lambda > 420 \text{ nm}$ | 104.2 $\mu\text{mol g}^{-1} \text{h}^{-1}$ | Nessler's reagent                            | 8         |
|                    | C-modified WO <sub>3</sub> •H <sub>2</sub> O | None                            | Full Spectrum              | 205 $\mu\text{mol g}^{-1} \text{h}^{-1}$   | Nessler's reagent                            | 9         |
|                    | BiOCl                                        | Methanol                        | Full Spectrum              | 92.4 $\mu\text{mol g}^{-1} \text{h}^{-1}$  | Nessler's reagent                            | 10        |
|                    | Bi <sub>5</sub> O <sub>7</sub> Br            | None                            | $\lambda > 400 \text{ nm}$ | 1380 $\mu\text{mol g}^{-1} \text{h}^{-1}$  | Nessler's reagent                            | 11        |
|                    | GNP/Bsi/Cr                                   | Na <sub>2</sub> SO <sub>3</sub> | Full Spectrum              | 13.3 $\text{mg m}^{-2} \text{h}^{-1}$      | Indophenol blue method, ammonia/ammonium ISE | 12        |
|                    | CuCr-LDH                                     | None                            | Full Spectrum              | 78.6 $\mu\text{mol g}^{-1} \text{h}^{-1}$  | Nessler's reagent                            | 13        |
| <i>After 2017</i>  | CdS:MoFe protein                             | HEPES                           | $\lambda = 405 \text{ nm}$ | 315 $\mu\text{mol g}^{-1} \text{min}^{-1}$ | Biovision, fluorescence assay                | 14        |
|                    | Au/TiO <sub>2</sub> -V <sub>o</sub>          | Methanol                        | Full Spectrum              | 78.6 $\mu\text{mol g}^{-1} \text{h}^{-1}$  | Indophenol blue method                       | 15        |
|                    | Cu-doped TiO <sub>2</sub>                    | None                            | Full Spectrum              | 78.9 $\mu\text{mol g}^{-1} \text{h}^{-1}$  | Ion chromatography                           | 16        |
|                    | Au/end-CeO <sub>2</sub>                      | Methanol                        | 808 nm laser               | 114.3 $\mu\text{mol g}^{-1} \text{h}^{-1}$ | Indophenol blue method                       | 17        |
|                    | TiO <sub>2</sub> /Au/a-TiO <sub>2</sub>      | None                            | Full Spectrum              | 13.4 $\text{nmol cm}^{-2} \text{h}^{-1}$   | Indophenol blue method                       | 18        |
|                    | Au-PTFE/TS                                   | Na <sub>2</sub> SO <sub>3</sub> | Full Spectrum              | 18.9 $\text{mg cm}^{-2} \text{h}^{-1}$     | indophenol blue method/ ammonia-             | 19        |

|                                                                  |          |               |                                                            | ammonium ISE      |    |
|------------------------------------------------------------------|----------|---------------|------------------------------------------------------------|-------------------|----|
| Mo-doped W <sub>18</sub> O <sub>49</sub>                         | None     | Full Spectrum | 3.324 mg h <sup>-1</sup><br>g <sup>-1</sup> <sub>cat</sub> | Nessler's reagent | 20 |
| BPCNS                                                            | methanol | >420 nm       | 9.846 mg h <sup>-1</sup><br>g <sup>-1</sup> <sub>cat</sub> | Nessler's reagent | 21 |
| g-C <sub>3</sub> N <sub>4</sub> /Cs <sub>x</sub> WO <sub>3</sub> | methanol | Full spectrum | 5.627 mg h <sup>-1</sup><br>g <sup>-1</sup> <sub>cat</sub> | Nessler's reagent | 22 |

Table 2. Comparison of heterogeneous catalysts for electrocatalytic N<sub>2</sub> reduction.

| Year                   | Catalyst                                                           | Electrolyte                           | Faradaic                     | Ammonia                                                   | Ammonia Detection<br>methods                      | Reference |
|------------------------|--------------------------------------------------------------------|---------------------------------------|------------------------------|-----------------------------------------------------------|---------------------------------------------------|-----------|
|                        |                                                                    |                                       | Efficiency                   | Generation rate<br>(V vs. RHE)                            |                                                   |           |
| <i>Before<br/>2019</i> | Tetrahexahedral Au                                                 | 0.1 M KOH                             | 4.0%                         | 16.48 mg h <sup>-1</sup> m <sup>-2</sup>                  | Nessler's reagent                                 | 23        |
|                        | a-Au/CeOx-RGO                                                      | 0.1 M HCl                             | 10.10%                       | 8.3 mg h <sup>-1</sup> g <sup>-1</sup> <sub>cat</sub>     | Indophenol blue method                            | 24        |
|                        | Au cluster/TiO <sub>2</sub>                                        | 0.1 M HCl                             | 8.11%                        | 21.4 mg h <sup>-1</sup> g <sup>-1</sup> <sub>cat</sub>    | Indophenol blue method                            | 25        |
|                        | Fe <sub>2</sub> O <sub>3</sub> /CNT                                | Gas-phase reaction                    | 0.14%<br>(-1.0 V vs Ag/AgCl) | 2.2 mg h <sup>-1</sup> m <sup>-2</sup> (-2.0 vs Ag/AgCl)  | salicylic acid method,<br>ammonia/ammonium<br>ISE | 26        |
|                        | PCN                                                                | 0.1 M HCl                             | 11.59%                       | 8.09 mg h <sup>-1</sup> g <sup>-1</sup> <sub>cat</sub>    | Indophenol blue method                            | 27        |
|                        | B-doped graphene                                                   | 0.05 M H <sub>2</sub> SO <sub>4</sub> | 10.8%                        | 98 mg h <sup>-1</sup> m <sup>-2</sup>                     | Indophenol blue method                            | 28        |
|                        | N-doped porous carbon                                              | 0.05 M H <sub>2</sub> SO <sub>4</sub> | -                            | 23.8 mg h <sup>-1</sup> g <sup>-1</sup> <sub>cat</sub>    | Nessler's reagent                                 | 29        |
|                        | Mo <sub>2</sub> N nanorod                                          | 0.1 M HCl                             | 4.5%                         | 78.4 mg h <sup>-1</sup> g <sup>-1</sup> <sub>cat</sub>    | Indophenol blue method                            | 30        |
|                        | Au SAs-N-doped porous carbons                                      | 0.1 M HCl                             | 22%                          | 360 mg h <sup>-1</sup> m <sup>-2</sup>                    | Indophenol blue method                            | 31        |
|                        | Ru SACs/N-C                                                        | 0.05 M H <sub>2</sub> SO <sub>4</sub> | 29.6%                        | 120.9 mg h <sup>-1</sup> g <sup>-1</sup> <sub>cat</sub>   | Indophenol blue method,<br>IC                     | 32        |
|                        | a-Bi <sub>4</sub> V <sub>2</sub> O <sub>11</sub> /CeO <sub>2</sub> | 0.1 M HCl                             | 10.16%                       | 23.21 mg h <sup>-1</sup> g <sup>-1</sup> <sub>cat</sub>   | Indophenol blue method                            | 33        |
| <i>After<br/>2019</i>  | hierarchical porous MoN@NC                                         | 0.1 M HCl                             | 6.9%                         | 76.9 µg h <sup>-1</sup> mg <sup>-1</sup>                  | Indophenol blue method                            | 34        |
|                        | CuO NWAs                                                           | 0.2 M Na <sub>2</sub> SO <sub>4</sub> | 95.8%                        | 0.245 mmol h <sup>-1</sup> cm <sup>-2</sup>               | NMR/colorimetric methods                          | 35        |
|                        | Ni <sub>x</sub> Zn <sub>(1-x)</sub> BMOF                           | 0.1 M KOH                             | 21%                          | 115 µg cm <sup>-2</sup> h <sup>-1</sup>                   | Nessler's reagent                                 | 36        |
|                        | Au <sub>1</sub> Cu <sub>1</sub>                                    | 0.05 M H <sub>2</sub> SO <sub>4</sub> | 54.96%                       | 154.91 µg h <sup>-1</sup> mg <sub>cat</sub> <sup>-1</sup> | Indophenol blue method                            | 37        |
|                        | S-rich MoS <sub>2</sub>                                            | 0.1 M Li <sub>2</sub> SO <sub>4</sub> | 9.81%                        | 43.4 µg h <sup>-1</sup> mg <sup>-1</sup>                  | indophenol blue method                            | 38        |
|                        | p-Fe <sub>2</sub> O <sub>3</sub> /CC                               | 0.1 M Na <sub>2</sub> SO <sub>4</sub> | 7.69%                        | 6.78 µg h <sup>-1</sup> cm <sup>-2</sup>                  | indophenol blue method                            | 39        |
|                        | AuPdP NWs                                                          | 0.1 M Na <sub>2</sub> SO <sub>4</sub> | 15.44%                       | 7.51 µg h <sup>-1</sup> cm <sup>-2</sup>                  | indophenol blue method                            | 40        |

**Table 3.** Photovoltaic performance of Cu<sub>2</sub>S-In<sub>2</sub>S<sub>3</sub>, Cu<sub>2</sub>S and In<sub>2</sub>S<sub>3</sub> photovoltaic devices.

| Device                                           | V <sub>oc</sub> /V | V <sub>eff</sub> /V | J <sub>sc</sub> /mA cm <sup>-2</sup> | FF/% | PCE/% |
|--------------------------------------------------|--------------------|---------------------|--------------------------------------|------|-------|
| In <sub>2</sub> S <sub>3</sub>                   | 0.61               | 0.6057              | 5.02                                 | 42.3 | 1.29  |
| Cu <sub>2</sub> S                                | 0.70               | 0.6949              | 9.51                                 | 53   | 3.52  |
| Cu <sub>2</sub> S-In <sub>2</sub> S <sub>3</sub> | 0.75               | 0.7497              | 16.05                                | 69   | 8.31  |



## Supplemental References

1. Aayush, R. S. et al. (2019). Strategies toward Selective Electrochemical Ammonia Synthesis. *ACS Catal.* **9**, 8316-8324.
2. Zhang, M. Y. et al. (2019). Reconfiguration of interfacial energy band structure for high-performance inverted structure perovskite solar cells. *Nat. Commun.* **10**, 4593.
3. Miyama, H., Fujii, N., Nagae, Y. (1980). Heterogeneous photocatalytic synthesis of ammonia from water and nitrogen. *Chem. Phys. Lett.* **74**, 523-524.
4. Schrauzer, G. N., Guth, T. D. (1977). Photolysis of water and photoreduction of nitrogen on titanium dioxide. *J. Am. Chem. Soc.* **99**, 7189-7193.
5. Zhu, D., Zhang, L., Ruther, R. E., Hamers, R. J. (2013). Photo-illuminated diamond as a solid-state source of solvated electrons in water for nitrogen reduction. *Nat. Mater.* **12**, 836-841.
6. Oshikiri, T., Ueno, K., Misawa, H. (2014). Plasmon-induced ammonia synthesis through nitrogen photofixation with visible light irradiation. *Angew. Chem. Int. Ed.* **53**, 9802-9805.
7. Li, Q., Domen, K., Naito, S., Onishi, T., Tamaru, K. (1983). Photocatalytic synthesis and photo-decomposition of ammonia over  $\text{SrTiO}_3$  and  $\text{BaTiO}_3$  based catalysts. *Chem. Lett.* **12**, 321-324.
8. Li, H., Shang, J., Ai, Z., Zhang, L. (2015). Efficient visible light nitrogen fixation with BiOBr nanosheets of oxygen vacancies on the exposed {001} facets. *J. Am. Chem. Soc.* **137**, 6393-6399.
9. Li, X., Wang, W., Jiang, D., Sun, S., Zhang, L., Sun, X. (2016). Efficient solar-driven nitrogen fixation over carbon-tungstic-acid hybrids. *Chem. Eur. J.* **22**, 13819-13822.
10. Li, H., Shang, J., Shi, J., Zhao, K., Zhang, L. (2016). Facet-dependent solar ammonia synthesis of BiOCl nanosheets via a proton-assisted electron transfer pathway. *Nanoscale* **8**, 1986-1993.
11. Wang, S., Hai, X., Ding, X., Chang, K., Xiang, Y., Meng, X., Yang, Z., Chen, H., Ye, J. (2017). Light-switchable oxygen vacancies in ultrafine  $\text{Bi}_5\text{O}_7\text{Br}$  nanotubes for boosting solar-driven nitrogen fixation in pure water. *Adv. Mater.* **29**, 1701774.
12. Ali, M., Zhou, F., Chen, K., Kotzur, C., Xiao, C., Bourgeois, L., Zhang, X., MacFarlane, D. R. (2016). Nanostructured photoelectrochemical solar cell for nitrogen reduction using plasmon-enhanced black silicon. *Nat. Commun.* **7**, 11335.
13. Wang, Y. J., Wei, W. S., Li, M. Y., Hu, S. Z., Zhang, J., Feng, R. J. (2017). In situ construction of Z-scheme  $\text{g-C}_3\text{N}_4/\text{Mg}_{1.1}\text{Al}_{0.3}\text{Fe}_{0.2}\text{O}_{1.7}$  nanorod heterostructures with high  $\text{N}_2$  photofixation ability under visible light. *RSC Adv.* **7**, 18099-18107.
14. Brown, K. A., Harris, D. F., Wilker, M. B., Rasmussen, A., Khadka, N., Hamby, H., Keable, S., Dukovic, G., Peters, J. W., Seefeldt, L. C., et al. (2016). Light-driven dinitrogen reduction catalyzed by a CdS:nitrogenase MoFe protein biohybrid. *Science* **352**, 448-450.
15. Yang, J., Guo, Y., Jiang, R., Qin, F., Zhang, H., Lu, W., Wang, J., Yu, J. C. (2018). High-efficiency "working-in-tandem" nitrogen photofixation achieved by assembling plasmonic gold nanocrystals on ultrathin titania nanosheets. *J. Am. Chem. Soc.* **140**, 8497-8508.
16. Zhao, Y., Zhao, Y., Shi, R., Wang, B., Waterhouse, G. I. N., Wu, L. Z., Tung, C. H., Zhang, T. (2019). Tuning oxygen vacancies in ultrathin  $\text{TiO}_2$  nanosheets to boost photocatalytic nitrogen fixation up to 700 nm. *Adv. Mater.* **31**, 1806482.
17. Jia, H., Du, A., Zhang, H., Yang, J., Jiang, R., Wang, J., Zhang, C. Y. (2019). Site-selective growth of crystalline ceria with oxygen vacancies on gold nanocrystals for near-infrared nitrogen photofixation. *J. Am. Chem. Soc.* **141**, 5083-5086.
18. Li, C., Wang, T., Zhao, Z.-J., Yang, W., Li, J.-F., Li, A., Yang, Z., Ozin, G. A., Gong, J. (2018). Promoted fixation of molecular nitrogen with surface oxygen vacancies on plasmon-enhanced  $\text{TiO}_2$  photoelectrodes. *Angew. Chem. Int. Ed.* **57**, 5278-5282.
19. Zheng, J. Y. et al. (2019). Photoelectrochemical Synthesis of Ammonia on the Aerophilic-Hydrophilic Heterostructure with 37.8% Efficiency. *Chem* **5**, 617-633.
20. Zhang, N. et al. (2018). Refining Defect States in  $\text{W}_{18}\text{O}_{49}$  by Mo Doping: A Strategy for Tuning  $\text{N}_2$  Activation towards Solar-Driven Nitrogen Fixation. *J. Am. Chem. Soc.* **140**(30), 9434-9443.
21. Qiu, P. et al. (2018). Metal-free black phosphorus nanosheets-decorated graphitic carbon nitride nanosheets with CP bonds for excellent photocatalytic nitrogen fixation. *Appl. Catal., B* **221**, 27-35.
22. Shi, A. et al. (2018). Photocatalytic  $\text{NH}_3$  versus  $\text{H}_2$  evolution over  $\text{g-C}_3\text{N}_4/\text{Cs}_x\text{WO}_3$ :  $\text{O}_2$  and methanol tipping the scale. *Appl. Catal., B* **235**, 197-206.
23. Bao, D. et al. (2017). Electrochemical Reduction of  $\text{N}_2$  under Ambient Conditions for Artificial  $\text{N}_2$  Fixation and Renewable Energy Storage Using  $\text{N}_2/\text{NH}_3$  Cycle. *Adv. Mater.* **29**, 1604799.

24. Li, S. J. et al. (2017). Amorphizing of Au Nanoparticles by CeO<sub>x</sub>-RGO Hybrid Support towards Highly Efficient Electrocatalyst for N<sub>2</sub> Reduction under Ambient Conditions. *Adv. Mater.* **29**, 1700001.
25. Shi, M. M. et al. (2017). Au Sub-Nanoclusters on TiO<sub>2</sub> toward Highly Efficient and Selective Electrocatalyst for N<sub>2</sub> Conversion to NH<sub>3</sub> at Ambient Conditions. *Adv. Mater.* **29**, 1606550.
26. Chen, S. et al. (2017). Electrocatalytic Synthesis of Ammonia at Room Temperature and Atmospheric Pressure from Water and Nitrogen on a Carbon-Nanotube-Based Electrocatalyst. *Angew. Chem. Int. Ed.* **56**, 2699-2703.
27. Lv, C. et al. (2018). Defect Engineering Metal-Free Polymeric Carbon Nitride Electrocatalyst for Effective Nitrogen Fixation under Ambient Conditions. *Angew. Chem. Int. Ed.* **57**, 10246-10250.
28. Yu, X. et al. (2018). Boron-Doped Graphene for Electrocatalytic N<sub>2</sub> Reduction. *Joule* **2**, 1610-1622.
29. Liu, Y. et al. (2018). Facile Ammonia Synthesis from Electrocatalytic N<sub>2</sub> Reduction under Ambient Conditions on N-Doped Porous Carbon. *ACS Catal.* **8**, 1186-1191.
30. Ren, X. et al. (2018). Electrochemical N<sub>2</sub> fixation to NH<sub>3</sub> under ambient conditions: Mo<sub>2</sub>N nanorod as a highly efficient and selective catalyst. *Chem. Commun.* **54**, 8474-8477.
31. Wang, H. et al. (2018). Ambient Electrosynthesis of Ammonia: Electrode Porosity and Composition Engineering. *Angew. Chem. Int. Ed.* **57**, 12360-12364.
32. Geng, Z. et al. (2018). Achieving a Record-High Yield Rate of 120.9 μg<sub>NH3</sub> mg<sub>cat</sub><sup>-1</sup> h<sup>-1</sup> for N<sub>2</sub> Electrochemical Reduction over Ru Single-Atom Catalysts. *Adv. Mater.* **30**, 1803498.
33. Lv, C. et al. (2018). An Amorphous Noble-Metal-Free Electrocatalyst that Enables Nitrogen Fixation under Ambient Conditions. *Angew. Chem. Int. Ed.* **57**, 6073-6076.
34. Yang, X. H. et al. (2019). Insights into the role of cation vacancy for significantly enhanced electrochemical nitrogen reduction. *Appl. Catal., B* **264**, 118477.
35. Wang, Y. T. et al. (2020). Unveiling the Activity Origin of a Copper-based Electrocatalyst for Selective Nitrate Reduction to Ammonia. *Angew. Chem. Int. Ed.* **59**, 5350-5354.
36. Mukherjee, S. et al. Atomically Dispersed Single Ni Site Catalysts for Nitrogen Reduction toward Electrochemical Ammonia Synthesis Using N<sub>2</sub> and H<sub>2</sub>O. *Small Methods* 1900821 (2020).
37. Liu, Y. Q. et al. (2020). Coupling Cu with Au for enhanced electrocatalytic activity of nitrogen reduction reaction. *Nanoscale* **12**, 1811-1816.
38. Liu, Y. Y. et al. (2019). Ambient Ammonia Electrosynthesis: Dramatically Enhanced Ambient Ammonia Electrosynthesis Performance by In-Operando Created Li-S Interactions on MoS<sub>2</sub> Electrocatalyst. *Adv. Energy Mater.* **9**, 1970042.
39. Wang, Z. Q. et al. (2019). Electrocatalytic Nitrogen Reduction to Ammonia by Fe<sub>2</sub>O<sub>3</sub> Nanorod Array on Carbon Cloth. *ACS Sustainable Chem. Eng.* **7**, 11754-11759.
40. Wang, H. J. et al. (2019). Metal-Nonmetal One-Dimensional Electrocatalyst: AuPdP Nanowires for Ambient Nitrogen Reduction to Ammonia. *ACS Sustainable Chem. Eng.* **7**, 15772-15777.
